# Supplementary material for: Dual RNA-seq analysis provides new insights into interactions between Norway spruce and necrotrophic pathogen Heterobasidion annosum s.l
Source: BMC Plant Biol. 2019 Jan 3;19:2. doi: 10.1186/s12870-018-1602-0 (PMC6318961; doi:10.1186/s12870-018-1602-0)
Supplement: Supplementary file 1 — Table S1. List of Heterobasidion genes expressed during colonization of Norway spruce trees. (XLSX 74 kb) [file 12870_2018_1602_MOESM1_ESM.xlsx]

## Sheet: Table S1
Table S1. List of Heterobasidion genes expressed during colonization of Norway spruce trees
MycoCosm gene model	Mycocosm protein number	logCPM	Annotation
e_gw1.09.1454.1	326350	11.9667	DUF21 domain-containing protein of unknown function
Hetan1.e_gw1.13.787.1	56295	11.1433	protein model without a start codon; no conserved domains
Hetan1.estExt_fgenesh2_pm.C_120271	157474	9.77661	GH15 glycoside hydrolase (putative secreted glucan 1,4-alpha-glucosidase; mostly glyucoamylases and glucodextranases)
estExt_Genewise1.C_091291	388390	9.137	oxysterol-binding protein
fgenesh1_pg.09_#_277	429222	9.02117	putative pimeloyl-ACP methyl ester carboxylesterase
Hetan1.Genemark.10114_g	109041	8.556	hypothetical protein without conserved domains; no signal sequence
estExt_Genemark.C_090448	460426	8.15425	Sel1-repeat family protein (proteins of this family function as adaptors for assembly of macromolecular complexes)
Genemark.7009_g	454181	7.74724	Bud13 domain-containing protein (likely involved in pre-mRNA splicing)
fgenesh1_pg.09_#_403	429348	7.62743	uncharacterized conserved tetratricopetide repeat-containing protein
estExt_Genewise1.C_022928	380619	7.19014	hypothetical protein without conserved domains; no signal sequence
Hetan1.Genemark.10041_g	108968	6.61776	hypothetical protein without conserved domains; no signal sequence
fgenesh1_kg.09_#_296_#_4279_0_CCOZ1209.g1_CCOZ_CCPA_CCPB_CCPC_EXTA	411348	5.95556	hypothetical protein without conserved domains; no signal sequence; putative effector according to effectorP
estExt_Genewise1.C_091381	388424	5.82426	leucine-rich repeat domain-containing protein; has similarity with bacterial E3 ubiquitin-protein ligases acting as virulence factors
Hetan1.estExt_fgenesh2_pm.C_160021	157870	5.75006	ABCF2 protein; Gcn20 homologue
Hetan1.estExt_Genewise1Plus.C_160062	68367	5.55314	secreted S10 serine carboxypeptidase
e_gw1.09.1457.1	325996	5.52461	DEAD box helicase
Hetan1.Genemark.7165_g	106092	5.49496	3-oxoacyl-reductase
fgenesh1_pg.09_#_318	429263	5.3994	hypothetical protein without conserved domains; no signal sequence
Hetan1.e_gw1.1.156.1	42568	5.28602	oligopeptide transporter
Hetan1.AOL_EuGene18000072	181114	5.27537	hydrophobin, putative
Hetan1.EuGene15000142	165326	5.19994	MFS transporter
estExt_Genewise1Plus.C_091344	479507	5.12886	Putative histone methyltransferase (Dot1-like)
Genemark.3046_g	450218	5.06938	hypothetical protein without conserved domains; no signal peptide
Hetan1.estExt_Genewise1.C_50840	35648	5.03463	aldo/keto reductase
e_gw1.07.1957.1	322477	5.02352	GH115 glycoside hydrolase (candidate secreted xylan a-glucuronidase)
fgenesh1_pm.12_#_439	422754	5.00302	isoprenylcysteine carboxylmethyltransferase family protein
Hetan1.estExt_Genewise1Plus.C_70101	64706	4.99636	CE15 carbohydrate esterase ( candidate glucuronoyl methylesterase, contains a signal peptide)
Genemark.7183_g	454355	4.9792	putative ribonuclease III; putative effector according to effectorP
e_gw1.09.151.1	325318	4.96018	hypothetical protein without conserved domains; no signal sequence;
Hetan1.fgenesh2_pm.C_scaffold_12000009	126495	4.95397	agmatinase, putative
Hetan1.e_gw1.3.233.1	46257	4.90775	Cytochrome P450 monooxygenase 108 (CYP5144); unknown function; no signal peptide
estExt_Genewise1Plus.C_091360	479514	4.89959	uncharacterized conserved tetratricopetide repeat-containing protein
Hetan1.estExt_Genewise1Plus.C_80406	65511	4.8606	NADH dehydrogenase
e_gw1.03.2790.1	313499	4.84797	Brix domain-containing protein; might have a role in ribosome biogenesis
Hetan1.fgenesh2_pg.C_scaffold_8000100	118397	4.8438	GH28 glycoside hydrolase (candidate secreted polygalacturonase)
e_gw1.05.1703.1	318347	4.82731	3'-5' exonuclease; involved in processing and maturation of RNA
Hetan1.e_gw1.9.122.1	53076	4.80689	GH5 glycoside hydrolase (candidate b-glycosidase)< no signal peptide
e_gw1.07.1664.1	321457	4.80223	Cytochrome P450 monooxygenase 105 (CYP5348); unknown function
Hetan1.e_gw1.9.966.1	52869	4.7875	conserved hypothetical protein without conserved domains; no signal peptide; putative effector according to effectorP
Genemark.8463_g	455635	4.78513	hypothetical protein without conserved domains; no signal peptide; putative effector according to effectorP
estExt_Genewise1Plus.C_021820	471025	4.77777	ribosomal protein L24e
estExt_fgenesh1_pg.C_120269	446792	4.76708	conserved hypothetical protein without conserved domains; no signal sequence; putative effector according to effectorP
estExt_Genewise1.C_010098	377052	4.75231	NAD(P)/FAD-dependent oxidoreductase
e_gw1.02.3690.1	309932	4.75196	mitochondrial ribosomal protein L31
Hetan1.estExt_Genewise1Plus.C_40721	62665	4.74922	GH2 glycoside hydrolase (candidate secreted b-mannosidase)
gw1.01.3238.1	244643	4.74404	mitochondrial protein Bot1p
estExt_Genewise1.C_091331	388401	4.743	hypothetical protein without conserved domains; no signal sequence
e_gw1.03.3132.1	313873	4.72067	Ran-binding protein
fgenesh1_kg.09_#_366_#_116252	411418	4.70153	retrotransposon-encoded polyprotein (protease, reverse transcriptase and integrase)
e_gw1.02.3018.1	311041	4.698	hypothetical cupredoxin domain-containing secreted protein
e_gw1.05.86.1	318776	4.69688	secreted esterase / lipase, putative
Hetan1.EuGene4000484	170469	4.68184	Cytochrome P450 monooxygenase 54 (CYP5150); unknown function
e_gw1.11.1662.1	328280	4.64491	conserved hypothetical secreted protein with DPBB motif; might have a role in plant cell wall binding; predicted as putative effector by effectorP
Hetan1.estExt_fgenesh2_pm.C_120261	157466	4.63753	L-fuconate dehydratase, putative
estExt_Genemark.C_140073	461411	4.62519	hypothetical secreted protein with a metallophosphatase domain
fgenesh1_kg.02_#_340_#_3331_1_CCOZ_CCPA_CCPB_CCPC_EXTA	407642	4.62508	ribosome biogenesis protein Nop16
estExt_fgenesh1_pm.C_060729	434890	4.6119	SUR7 domain-containing protein; might have a role in endocytosis or in pH sensing
estExt_Genewise1.C_130205	390749	4.60709	putative muconate lactonising enzyme or muconate cycloisomerase
estExt_fgenesh1_pg.C_040550	444674	4.60698	GMP synthetase (purine biosynthesis)
estExt_fgenesh1_pm.C_020712	432447	4.60301	tRNA methyltransferase
fgenesh1_pg.03_#_439	425693	4.6027	dUTP diphosphatase; putative effector according to effectorP
Hetan1.fgenesh2_pm.C_scaffold_10000224	126108	4.59216	MFS transporter
gw1.06.2469.1	247000	4.58906	putative adenylate kinase
estExt_fgenesh1_pg.C_140020	447024	4.58641	RNA polymerase, DNA directed
estExt_fgenesh1_pg.C_110392	446619	4.58006	conserved hypothetical protein without conserved domains; no signal sequence
Hetan1.estExt_Genewise1Plus.C_90100	65781	4.57777	GH13 glycoside hydrolase (candidate a-amylase)
Hetan1.estExt_Genewise1Plus.C_160017	68332	4.57154	Ca2+/H+ exchanger Vxc1-like protein
estExt_fgenesh1_kg.C_050191	439974	4.56847	conserved hypothetical protein with leucine-rich repeats; no signal peptide
Hetan1.Genemark.8846_g	107773	4.56011	GH3 glycoside hydrolase (candidate secreted b-xylosidase)
Genemark.8739_g	455911	4.55453	putative aldo/keto reductase
Hetan1.e_gw1.1.1882.1	41952	4.55246	RIO2 protein serine kinase; essential for rRNA maturation and cleavage
gw1.01.3697.1	247725	4.55229	mitochondrial ribosomal protein L51
Hetan1.e_gw1.14.286.1	57288	4.54992	PIN_Fcf1 domain-containing protein; likely has a role in pre-rRNA processing and 40S subunit assembly; putative effector according to effectorP
Hetan1.AOL_estExt_fgenesh2_pg.C_10080	181091	4.54692	conserved hypothetical protein without conserved domains; no signal peptide
fgenesh1_pg.05_#_166	426907	4.54532	DUF3605 domain-containing uncharacterized hypothetical protein
Hetan1.EuGene12000286	163937	4.54472	secreted esterase / lipase, putative
e_gw1.01.3403.1	308185	4.53075	UDP-N-acetylglucosamine pyrophosphorylase
e_gw1.03.1553.1	314580	4.52529	ribosome assembly protein 3
Hetan1.Genemark.2685_g	101612	4.51276	conserved uncharacterized protein with DUF3712 domains; no signal peptide
e_gw1.01.2627.1	307924	4.51266	uncharacterized alpha/beta hydrolase; no signal peptide; putative effector according to effectorP
Hetan1.Genemark.2653_g	101580	4.50542	manganese peroxidase 5 (secreted), belongs to Fungal lignin peroxidases
Hetan1.estExt_Genewise1Plus.C_120793	67557	4.49328	S53 serine protease
Hetan1.estExt_fgenesh2_pm.C_80250	156632	4.48171	putative tRNA-dihydrouridine synthase
estExt_fgenesh1_pm.C_130317	437163	4.47601	putative DNA polymerase sigma
Hetan1.estExt_fgenesh2_pm.C_20209	154277	4.47199	pirin (nuclear protein of unknown function)
Hetan1.estExt_Genewise1Plus.C_31516	61998	4.4682	MFS sugar transporter
Hetan1.Genemark.10080_g	109007	4.46265	putative A-type ATPase BCS1 (mitochondrial chaperone)
gw1.06.2199.1	243963	4.45313	mitochondrial ribosomal protein S6
estExt_fgenesh1_pm.C_070246	435080	4.45218	mitochondrial/chloroplast ribosomal protein S19
Hetan1.Genemark.9654_g	108581	4.43385	hypothetical protein without conserved domains; no signal sequence
Hetan1.estExt_fgenesh3_kg.C_60018	147230	4.43357	MFS transporter (cutative sugar transporter)
fgenesh1_pm.06_#_582	418837	4.42273	conserved uncharacterized hypothetical protein without conserved domains; has a predicted signal sequence
Hetan1.estExt_fgenesh2_pg.C_100320	152543	4.41287	predicted phenol-2-monooxygenase
estExt_Genewise1.C_011123	377629	4.39094	acetylglutamate kinase/acetylglutamate synthase (arginine biosynthesis pathway)
e_gw1.03.3524.1	314245	4.37889	conserved hypothetical protein without conserved domains; no signal sequence
estExt_fgenesh1_pg.C_020365	443574	4.37871	DNA/RNA non-specific endonuclease
e_gw1.05.2095.1	317029	4.37329	ribosomal protein L1
Hetan1.EuGene2000349	167763	4.35416	conserved hypothetical protein without conserved domains; no signal sequence
Hetan1.Genemark.7488_g	106415	4.34698	putative purine-cytosine permease
gw1.02.3244.1	244339	4.32545	UBA-like domain containing protein of unknown function; incomplete gene model; no start and stop codons
Hetan1.EuGene16000052	165527	4.32095	DNA topoisomerase, type 2
estExt_Genemark.C_070328	459750	4.32005	uncharacterized conserved protein containing CUE and PAT1 domains
Hetan1.fgenesh2_pm.C_scaffold_10000094	125978	4.31961	MFS transporter
estExt_Genewise1Plus.C_060793	476210	4.31806	ubiquitin (UBL) and BAG domain-containing protein; putative effector according to effectorP
Hetan1.estExt_fgenesh2_pg.C_160094	153387	4.31577	GH31 glycoside hydrolase (candidate secreted a-glucosidase; has a predicted signal peptide)
Genemark.2132_g	449304	4.31025	ankyrin repeat-containing conserved protein of unknown function; no signal peptide
estExt_Genewise1.C_110034	389267	4.30886	conserved hypothetical protein without conserved domains; no signal sequence
Hetan1.fgenesh2_pg.C_scaffold_16000018	120905	4.29921	hypothetical protein with MYST-like histone acetyltransferase domain; putative effector according to effectorP;
Hetan1.gw1.8.131.1	11056	4.29024	Cytochrome P450 monooxygenase 75 (CYP5065); unknown function
e_gw1.04.2619.1	315128	4.28435	secreted S8 serine peptidase
Hetan1.e_gw1.2.216.1	44412	4.28386	S53 serine protease; no signal peptide
Hetan1.estExt_fgenesh3_kg.C_170022	149241	4.28082	secreted aspartic peptidase, putative; predicted signal peptide
e_gw1.01.1649.1	305492	4.27622	uncharacterized conserved protein with some similarity to glycoside hydrolases GH127
Hetan1.fgenesh2_pm.C_scaffold_12000304	126790	4.2706	putative phospholipid-translocating P-type ATPase
fgenesh1_pg.08_#_133	428575	4.26938	replication factor C, small subunit
Hetan1.Genemark.7583_g	106510	4.26562	uncharacterized protein without conserved domains; no signal sequence
estExt_fgenesh1_pm.C_040315	433642	4.25867	uncharacterized conserved SPT2 domain-containing protein; might have a role in the maintaining of chromatin structure; no signal peptide
fgenesh1_pm.08_#_654	420426	4.25636	WD40 domain-containing protein
estExt_fgenesh1_kg.C_070156	440794	4.25383	A49-like RNA polymerase I associated factor, putative
Hetan1.Genemark.10113_g	109040	4.2496	predicted N-acetyltransferase
gw1.08.1564.1	238047	4.22634	conserved uncharacterized WD40 repeat domain-containing protein
Hetan1.estExt_Genewise1Plus.C_71026	65272	4.22412	permease of the drug/metabolite transporter (DMT) superfamily; triose phosphate transporter, putative
Hetan1.e_gw1.6.1261.1	50287	4.22302	lipase (class 3)
Hetan1.T_R_EuGene3000949	181084	4.21758	MAP kinase similar to S. cerevisiae Mkk1 and Mkk2 (has a role in control of cell integrity)
Hetan1.EuGene4000170	170155	4.2009	TOM7 subunit of the translocase of the outer mitochondrial membrane
Hetan1.estExt_Genewise1Plus.C_90795	66116	4.19547	Cytochrome P450 monooxygenase 16 (CYP5144); unknown function; predicted signal peptide
Hetan1.estExt_Genewise1Plus.C_130484	67832	4.19201	dynamin-like protein
Hetan1.e_gw1.1.398.1	41260	4.18676	MFS transporter
fgenesh1_pm.03_#_736	416053	4.18472	complex1_LYR_2 domain-containing protein: might be involved in Fe - S cluster biogenesis in mitochondria; predicted effector according to effectorP
estExt_Genewise1.C_012433	378489	4.18272	asparagine synthetase B
estExt_Genewise1.C_140326	391413	4.18189	dynamin-like protein
estExt_fgenesh1_pg.C_080351	445856	4.17867	conserved hypothetical protein with Zn-finger domain; no signal peptide
fgenesh1_pm.01_#_157	413015	4.1777	hypothetical protein without conserved domains; no signal peptide
Hetan1.estExt_fgenesh3_kg.C_80131	147917	4.16354	hypothetical protein without conserved domains; no signal peptide
gw1.08.1700.1	240083	4.154	4-phosphopantoate--beta-alanine ligase
Hetan1.EuGene7000302	173241	4.14088	squalene/phytoene synthase, putative
Hetan1.gw1.10.593.1	21632	4.12724	Cytochrome P450 monooxygenase 34 (CYP5416); unknown function; predicted secretion signal peptide
Genemark.643_g	447815	4.11826	dienelactone hydrolase, putative; predicted effector according to effectorP
fgenesh1_pm.02_#_338	414451	4.11469	ATP12 protein (molecular chaperone of the mitochondrial matrix)
Hetan1.fgenesh2_pm.C_scaffold_2000055	122112	4.09435	MFS sugar transporter, putative
e_gw1.06.1762.1	319562	4.05912	tyrosine-tRNA ligase
fgenesh1_pg.05_#_391	427132	4.04802	RRM_SF and YTH domain-containing protein; might have role in RNA processing and splicing
Hetan1.EuGene10000418	162813	4.04571	carboxyesterase, secreted, putative
estExt_Genewise1Plus.C_010701	468407	4.02305	ubiquitin-conjugating enzyme E2, putative
Hetan1.Genemark.3101_g	102028	4.02215	hypothetical protein without conserved domains; no signal sequence
fgenesh1_pg.11_#_363	430154	4.01507	uncharacterized conserved protein containing SMP-30/gluconolaconase/LRE-like region
estExt_Genewise1Plus.C_061448	476581	4.00851	conserved hypothetical protein without conserved domains< no signal peptide
e_gw1.06.1912.1	319489	3.9915	phytanoyl-CoA dioxygenase family member
e_gw1.09.1584.1	326185	3.98882	Atp10 protein; essential for the assembly of the functional mitochondrial ATPase
Hetan1.estExt_Genewise1Plus.C_21744	61042	3.98701	predicted oligosaccharyltransferase subunit; involved in protein glycosylation
Hetan1.e_gw1.6.707.1	50265	3.98645	DNA helicase, putative
e_gw1.01.1810.1	305990	3.98079	uncharacterized conserved protein without conserved domains; no signal sequence
Hetan1.estExt_Genewise1.C_140270	39756	3.97551	predicted oxaloacetate acetylhydrolase (oxaloacetase); generates oxalic acid from oxaloacetate
gw1.01.1591.1	235157	3.97509	uncharacterized conserved membrane protein
Hetan1.EuGene7000124	173063	3.96849	Voltage-dependent anion channel (possible sulfite or malate transporter)
fgenesh1_pm.14_#_246	423513	3.96792	conserved hypothetical protein without conserved domains; predicted signal peptide
Hetan1.EuGene14000300	165050	3.96449	CE16 carbohydrate esterase; has a signal peptide
fgenesh1_pm.09_#_423	420932	3.96279	AC19 subunit of RNA polymerases I and III
Genemark.2840_g	450012	3.95668	hypothetical protein without conserved domains; no signal peptide; putative effector according to effectorP
estExt_Genewise1.C_051530	384428	3.9532	tyrosinase-domain containing protein
Hetan1.dfl_e_gw1.13.150.1	181227	3.94215	CE1 carbohydrate esterase (putative acetylxylan esterase, contains a signal peptide)
Hetan1.fgenesh3_kg.2__382__4800_1_CCOZ_CCPA_CCPB_CCPC_EXTA	141440	3.9333	hypothetical protein without conserved domains; no signal sequence
Hetan1.estExt_Genewise1Plus.C_100197	66253	3.93099	conserved uncharacterized WD40 repeat domain-containing protein
Hetan1.estExt_fgenesh2_pm.C_20282	154323	3.92544	putative proteolipid membrane potential modulator Pmp3; functions to modulate the membrane potential, particularly to resist high cellular cation concentration
Hetan1.estExt_fgenesh2_pm.C_140047	157680	3.92465	MFS carbohydrate transporter, putative
Hetan1.Genemark.6224_g	105151	3.90978	hypothetical protein without conserved domains; predicted signal peptide; putative effector according to effectorP
e_gw1.13.1052.1	331125	3.90382	conserved uncharacterized protein with glycosyltransferase domain; might have a role in cell wall biogenesis
Hetan1.e_gw1.14.508.1	57301	3.89704	GH79 glycoside hydrolase (candidate secreted b-glycosidase; has a predicted signal peptide)
estExt_fgenesh1_pm.C_010567	431549	3.89268	conserved uncharacterized Zn finger-containing protein; no signal peptide
Hetan1.estExt_Genewise1Plus.C_80202	65385	3.88665	putative uncharacterized dioxygenase related to isopenicillin N synthase
estExt_Genewise1.C_080068	386706	3.88305	hypothetical protein without conserved domains; no signal sequence
Hetan1.Genemark.4871_g	103798	3.88186	GMC family oxidoreductase 14
Hetan1.estExt_Genewise1Plus.C_40152	62302	3.88052	amine oxidase, putative; no signal peptide
Hetan1.fgenesh2_pm.C_scaffold_4000468	123886	3.87566	conserved uncharacterized WD40 repeat domain-containing protein; no signal peptide
Hetan1.fgenesh2_pg.C_scaffold_3000302	115814	3.86883	putative terpene cyclase cyc2; might be involved in the biosynthesis of Heterobasidion-specific toxins
Hetan1.e_gw1.1.487.1	41624	3.85167	MFS sugar (fucose?) transporter
fgenesh1_pg.14_#_117	431021	3.83127	calpain (calcium-dependent cytoplasmic cysteine proteinase)
e_gw1.09.1900.1	325386	3.82125	conserved hypothetical protein without conserved domains; no signal sequence
estExt_Genewise1Plus.C_090591	479129	3.81516	conserved hypothetical protein without conserved domains; no signal peptide
estExt_Genewise1Plus.C_031358	472613	3.7962	DUF3605 domain-containing uncharacterized hypothetical secreted protein
Hetan1.e_gw1.7.779.1	51586	3.79507	Cytochrome P450 monooxygenase 35 (CYP5352); unknown function
gw1.08.2000.1	244395	3.77764	zf-DNL domain-containing protein; might have a role in protein import into mitochondria
Hetan1.e_gw1.16.222.1	57931	3.76861	ChaC-like protein (putative cation transporter regulator)
estExt_fgenesh1_pg.C_140248	447153	3.76832	uncharacterized hypothetical protein; no signal peptide
Hetan1.estExt_Genewise1Plus.C_20287	60114	3.75419	GH6 glycoside hydrolase (candidate secreted cellobiohydrolase; N-terminal CBM1 module; has a predicted signal peptide)
e_gw1.05.742.1	318940	3.73632	conserved hypothetical protein without conserved domains; no signal sequence
estExt_fgenesh1_pm.C_010875	431773	3.72804	uncharacterized protein with PIN domain; might be involved in rRNA processing
Hetan1.dfl_EuGene1000506	181245	3.72528	GH5 glycoside hydrolase (candidate secreted b-1,4-endoglucanase; N-terminal CBM1 module; has a predicted signal peptide)
Hetan1.e_gw1.4.255.1	48060	3.72294	amino acid transporter
estExt_fgenesh1_kg.C_050016	439831	3.72169	hypothetical protein; no signal peptide; putative effector according to effectorP
estExt_Genemark.C_010017	456537	3.71994	conserved hypothetical protein without conserved domains; no signal sequence
estExt_Genewise1Plus.C_071352	477650	3.7072	caspase, putative
Hetan1.dfl_EuGene3000986	181235	3.69444	conserved hypothetical glycopeptide related to extracellular glycopeptides from Phanerochaete chrysosporium; possibly related to iron reduction.
fgenesh1_kg.09_#_300_#_144896	411352	3.68614	Cytochrome P450 monooxygenase 97 (CYP5431); unknown function; predicted secretion signal peptide
estExt_Genewise1.C_020290	379105	3.68417	hypothetical protein without conserved domains; no signal peptide; putative effector according to effectorP
fgenesh1_pm.06_#_813	419068	3.67152	hypothetical protein; no signal peptide; putative effector according to effectorP
Hetan1.Genemark.8128_g	107055	3.64394	hypothetical protein without conserved domains; no signal peptide
Hetan1.fgenesh2_pg.C_scaffold_3000213	115725	3.61633	uncharacterized DUF3128 domain-containing protein; no signal peptide; predicted as effector by effectorP
Hetan1.EuGene7000448	173387	3.6055	ribosomal protein L35
fgenesh1_pg.05_#_390	427131	3.60247	hypothetical protein without conserved domains; no signal peptide; putative effector according to effectorP
Hetan1.fgenesh2_pg.C_scaffold_12000342	120128	3.5926	hypothetical protein without conserved domains; no signal sequence
Hetan1.e_gw1.11.1127.1	54511	3.58631	mitochondrial import inner membrane protein translocase
Genemark.6106_g	453278	3.58234	old yellow enzyme-like alkene reductase; 12-oxophytodienoate reductase (12-OPDA reductase), putative
e_gw1.09.790.1	325669	3.57924	hypothetical protein without conserved domains; no signal sequence
Hetan1.gw1.5.136.1	11198	3.57718	amino acid transporter
e_gw1.05.338.1	318593	3.57474	DNA or RNA helicase, putative
Hetan1.EuGene9000118	174466	3.57431	GH28 glycoside hydrolase (candidate rhamnogalacturonan a-L-rhamnopyranohydrolase)
fgenesh1_pg.14_#_26	430930	3.57346	Efg1 protein; involved in rRNA processing
e_gw1.02.2812.1	309297	3.56555	tRNA intron endonuclease
Hetan1.e_gw1.5.197.1	49589	3.56394	MFS transporter
estExt_fgenesh1_pg.C_030300	444047	3.56335	conserved protein with RNA recognition motif domains; probably localized to nucleolus; no signal sequence
estExt_Genewise1.C_010405	377159	3.562	conserved hypothetical protein without conserved domains; no signal sequence
Hetan1.Genemark.7250_g	106177	3.55019	hypothetical protein without conserved domains; no signal sequence; putative effector according to effectorP
estExt_Genewise1Plus.C_070756	477348	3.50463	conserved BAR and SH3 domain-containing protein; might play a role in membrane trafficking or remodelling
fgenesh1_kg.12_#_87_#_4482_1_CCOZ_CCPA_CCPB_CCPC_EXTA	412167	3.47693	histidinol-phosphate aminotransferase, putative
Hetan1.EuGene8000428	174127	3.4762	conserved hypothetical protein without conserved domains; no signal sequence
estExt_Genewise1Plus.C_030432	471990	3.46144	DUF3245 domain-containing uncharacterized hypothetical protein; no signal peptide
Hetan1.e_gw1.16.104.1	57899	3.39407	Zn(II)2Cys6 transcription factor (similar to Aspergillus transcription factors regulating carbohydrate utilization)
e_gw1.09.1111.1	325139	3.36891	hypothetical protein without conserved domains; no signal sequence; putative effector according to effectorP
Hetan1.Genemark.8663_g	107590	3.31817	hypothetical protein without conserved domains; no signal peptide; putative effector according to effectorP
estExt_fgenesh1_pm.C_090517	436026	3.30378	hypothetical protein with DUF3602 domain; no signal sequence; putative effector according to effectorP
Hetan1.EuGene12000294	163945	3.28151	aryl-alcohol oxidase (aao) 7
estExt_Genewise1.C_090476	387972	3.27266	putative alkylhydroxyperoxidase; no signal sequence; predicted as effector by effectorP
Hetan1.estExt_fgenesh2_pm.C_40659	155557	3.26795	MFS transporter
gw1.02.3652.1	247745	3.25154	cupredoxin
e_gw1.01.3519.1	308369	3.24841	conserved hypothetical protein without conserved domains; no signal sequence
Hetan1.estExt_fgenesh2_pm.C_130063	157537	3.23732	putative secreted cellobiose dehydrogenase 1
estExt_Genewise1.C_091105	388307	3.23621	CBF domain-containing protein; probably involved in ribosome biogenesis
Hetan1.EuGene7000680	173619	3.21946	carboxyesterase, secreted, putative
estExt_fgenesh1_kg.C_080384	441277	3.20382	hypothetical protein without conserved domains; no signal peptide
Hetan1.EuGene14000316	165066	3.1983	predicted secreted protein with DPBB motif; might have a role in plant cell wall binding
Genemark.8647_g	455819	3.18278	ankyrin repeat-containing conserved protein of unknown function; no signal peptide
Hetan1.e_gw1.6.1360.1	50880	3.17376	conserved uncharacterized DUF2781 domain-containing protein; no signal sequence
e_gw1.05.1830.1	317013	3.17101	sulfite oxidase (SO) family molybdopterin binding domain-containing protein
Hetan1.e_gw1.9.634.1	53286	3.16681	Cytochrome P450 monooxygenase 28 (CYP5144); unknown function; predicted signal peptide
estExt_Genewise1.C_060218	384845	3.12637	conserved hypothetical protein without conserved domains; no signal peptide
Hetan1.estExt_Genewise1.C_70106	36460	3.11884	ferric reductase
fgenesh1_pm.09_#_232	420741	3.11632	conserved hypothetical protein without conserved domains; no signal peptide
estExt_Genemark.C_090501	460446	3.10796	hypothetical protein with DNA topoisomerase domain; no signal sequence
Hetan1.e_gw1.16.116.1	57977	3.08963	ABC transporter ABCB6.3 (unknown function)
estExt_Genewise1.C_031698	381745	3.08368	hypothetical protein without conserved domains; no signal peptide
Hetan1.fgenesh2_pm.C_scaffold_10000173	126057	3.08109	glutathione S-transferase GST10
Hetan1.estExt_fgenesh2_pm.C_70118	156243	3.05626	hypothetical protein without conserved domains; no signal peptide
Hetan1.estExt_Genewise1Plus.C_31603	62063	3.03353	GH5 glycoside hydrolase (candidate secreted b-mannanase; N-terminal CBM1 module)
Hetan1.Genemark.7307_g	106234	2.99506	hypothetical protein without conserved domains; no signal sequence
Hetan1.estExt_fgenesh2_pg.C_170070	153422	2.98939	GH5 glycoside hydrolase (candidate secreted b-glycosidase)
estExt_fgenesh1_pg.C_030456	444158	2.97509	uncharacterized hypothetical DUF2373 domain-containing protein; no signal sequence
Hetan1.EuGene7000278	173217	2.96555	hypothetical secreted protein; predicted signal peptide; putative effector according to effectorP
Genemark.5344_g	452516	2.93982	hypothetical protein without conserved domains; no signal peptide; putative effector according to effectorP
e_gw1.07.2096.1	321959	2.92212	conserved hypothetical protein; no signal peptide; putative effector according to effectorP
fgenesh1_pg.09_#_354	429299	2.91152	hypothetical protein without conserved domains; no signal sequence
Hetan1.e_gw1.14.242.1	56987	2.90747	GH12 glycoside hydrolase gh12.4 (candidate secreted endo-b-1,4-glucanase or xyloglucanase)
e_gw1.07.2031.1	322385	2.88117	endoglucanase E-like protein; no signal peptide
Hetan1.e_gw1.9.25.1	53480	2.88059	nps9 protein similar to nonribosomal peptide synthase
fgenesh1_pm.09_#_472	420981	2.87791	gag protein and protease encoded by a retrotransposon
Hetan1.EuGene4000587	170572	2.86651	carboxyesterase/lipase, putative
e_gw1.12.629.1	329692	2.84217	conserved hypothetical protein without conserved domains; no signal sequence
Genemark.4435_g	451607	2.84048	beta-phosphoglucomutase or related phosphatase, putative
estExt_fgenesh1_pm.C_060448	434715	2.83755	hypothetical protein without conserved domains; no signal peptide
Genemark.8714_g	455886	2.8356	hypothetical protein without conserved domains; no signal peptide; putative effector according to effectorP
e_gw1.03.2755.1	314160	2.82498	CoA pyrophosphatase
Hetan1.estExt_Genewise1.C_120774	39263	2.82141	putative cell surface ferric reductase; might have a role in iron uptake
e_gw1.09.671.1	325078	2.81037	hypothetical protein without conserved domains; no signal sequence
Hetan1.Genemark.9921_g	108848	2.80747	conserved hypothetical protein without conserved domains; no signal peptide
Hetan1.fgenesh2_pg.C_scaffold_3000096	115608	2.74994	hypothetical secreted protein without conserved domains; putative effector according to effectorP
estExt_Genewise1Plus.C_012758	469770	2.73579	carbonic anhydrase, putative< predicted effector according to effectorP
fgenesh1_pm.05_#_306	417710	2.71994	conserved uncharacterized WD40 repeat domain-containing protein
e_gw1.09.1669.1	325746	2.71407	NADPH-dependent carbonyl reductase of unknown function, putative; no signal peptide; putative effector according to effectorP
e_gw1.08.1748.1	324769	2.71349	oxidoreductase, 17beta hydroxysteroid dehydrogenase-like
Hetan1.e_gw1.14.150.1	57468	2.69946	putative lipase / acetyl esterase
e_gw1.08.422.1	323009	2.6849	squalene synthetase
Hetan1.Genemark.7162_g	106089	2.68435	manganese peroxidase 1, belongs to Fungal lignin peroxidases
fgenesh1_kg.01_#_9_#_2650_1_CCOZ_CCPA_CCPB_CCPC_EXTA	406533	2.67076	hypothetical protein without conserved domains; no signal sequence
Genemark.7412_g	454584	2.64727	SUZ domain-containing protein; might have an RNA-binding function; no signal peptide; putative effector according to effectorP
Hetan1.fgenesh2_pm.C_scaffold_12000294	126780	2.64688	GH27 glycoside hydrolase (candidate secreted a-galactosidase)
Hetan1.EuGene9000038	174386	2.64311	hypothetical protein without conserved domains; no signal peptide; putative effector according to effectorP
estExt_Genewise1Plus.C_140340	482531	2.64308	conserved hypothetical protein without conserved domains; no signal sequence
Hetan1.e_gw1.6.1039.1	50850	2.61278	bifunctional ornithine acetyltransferase/N-acetylglutamate synthase (involved in arginine biosynthesis)
Hetan1.estExt_Genewise1.C_70859	36931	2.59745	conserved hypothetical protein without conserved domains; no signal peptide
Hetan1.EuGene14000151	164901	2.59558	conserved hypothetical protein without conserved domains; no signal sequence
estExt_Genewise1Plus.C_032335	473230	2.58643	conserved hypothetical protein with some similarity to archaeal and bacterial DNA helicases; no signal sequence
estExt_fgenesh1_kg.C_030129	438837	2.57914	conserved hypothetical protein without conserved domains; no signal peptide
Genemark.4097_g	451269	2.57675	hypothetical secreted protein; predicted signal peptide; putative effector according to effectorP
Hetan1.fgenesh2_pg.C_scaffold_13000076	120219	2.56467	hypothetical protein without conserved domains; no signal peptide
Hetan1.Genemark.3665_g	102592	2.56399	chromosome segregation protein SMC, putative
Hetan1.EuGene3001019	169743	2.56275	copper transporter protein
Hetan1.gw1.1.1082.1	17676	2.55897	DUF4598 domain-containing uncharacterized hypothetical protein
Hetan1.YAI_EuGene9000355	181068	2.55525	manganese peroxidase 2, belongs to Fungal lignin peroxidases
estExt_Genewise1Plus.C_032365	473249	2.55063	hypothetical protein without conserved domains; no signal sequence
Hetan1.estExt_Genewise1Plus.C_70589	64994	2.54168	LPMO (AA9 / GH61)
estExt_Genewise1Plus.C_120408	481340	2.53587	uncharacterized conserved protein without conserved domains; no signal sequence
Hetan1.e_gw1.12.717.1	55937	2.5353	endonuclease, flap strycture specific, putative
Hetan1.estExt_fgenesh2_pg.C_50155	151266	2.53462	GH20 glycoside hydrolase (candidate secreted exochitinase)
fgenesh1_kg.12_#_254_#_2095_1_CCOZ_CCPA_CCPB_CCPC_EXTA	412334	2.50517	conserved hypothetical protein without conserved domains; no signal sequence
Hetan1.EuGene12000554	164205	2.48512	ferric reductase
e_gw1.05.1205.1	318841	2.48482	dienelactone hydrolase, putative; predictaed as effector by effectorP
Hetan1.EuGene12000437	164088	2.47542	conserved hypothetical protein without conserved domains; no signal sequence
fgenesh1_pg.05_#_46	426787	2.46845	similar to LigE beta esterase involved in lignin cleavage
estExt_fgenesh1_pm.C_110469	436664	2.46336	conserved hypothetical protein without conserved domains; no signal peptide
Hetan1.estExt_Genewise1.C_110899	38802	2.40977	GH7 glycoside hydrolase (candidate [reducing end-acting] secreted cellobiohydrolase)
Hetan1.Genemark.6963_g	105890	2.38975	BNR_4 domain-containing protein; predicted signal peptide; specifically expressed on lignin media
fgenesh1_pg.04_#_594	426682	2.37918	GH10 glycoside hydrolase (candidate secreted xylanase)
estExt_Genemark.C_030148	457831	2.37889	alpha/beta hydrolase; putative acetyl esterase or lipase; no signal peptide
Hetan1.EuGene10000141	162536	2.36756	uncharacterized protein without conserved domains; no signal sequence
estExt_Genewise1.C_080206	386765	2.36533	uncharacterized conserved protein without conserved domains; no signal sequence
Genemark.3746_g	450918	2.34782	hypothetical protein without conserved domains; no signal peptide
Hetan1.EuGene13000352	164633	2.34178	conserved hypothetical protein; no signal sequence
Hetan1.estExt_fgenesh2_pm.C_30474	154988	2.3414	hypothetical protein without conserved domains; no signal sequence
Hetan1.Genemark.2543_g	101470	2.33889	phosphatidylethanolamine-binding protein; has a predicted signal peptide
Hetan1.EuGene10000518	162913	2.32112	nps4 protein similar to nonribosomal peptide synthase
e_gw1.09.1571.1	325135	2.31715	ATP11 protein (molecular chaperone of the mitochondrial matrix)
e_gw1.12.163.1	330527	2.31477	kinase, putative, uncharacterized
Hetan1.gw1.14.108.1	12392	2.31253	GH28 glycoside hydrolase (candidate exopolygalacturonase)
e_gw1.08.647.1	324812	2.31213	conserved hypothetical protein without conserved domains; no signal sequence
estExt_Genewise1Plus.C_071547	477710	2.30243	Zn(II)2Cys6 transcription factor
Hetan1.e_gw1.4.2096.1	47915	2.29846	hypothetical protein without conserved domains; no signal sequence; putative effector according to effectorP; only a part of the predicted gene transcript has high score in RNAseq data; mapping or sequencing artefact???
fgenesh1_pm.05_#_817	418221	2.29791	conserved hypothetical protein without conserved domains; no signal sequence
estExt_fgenesh1_pg.C_120314	446810	2.29177	predicted O-methyltransferase; similar to Phanerochaete chrysosporium S-adenosyl-L-methionine-dependent methyltransferase that preferentially catalyzes the methylation of 3-OH phenolic compounds like isovanillic acid and 3-OH-4-Met cinnamic acid. May play a role in promoting lignin degradation by methylating and inactivating free-hydroxyl phenolic compounds, products of lignin cleavage which are …
Hetan1.Genemark.23_g	98950	2.29114	hypothetical protein without conserved domains; no signal sequence
Hetan1.EuGene11000144	163173	2.26937	hypothetical protein without conserved domains; no signal peptide
gw1.02.3513.1	246524	2.26924	RNA polymerase subunit, putative
estExt_fgenesh1_pg.C_110050	446436	2.26556	conserved hypothetical protein without conserved domains; no signal peptide
e_gw1.01.868.1	305531	2.2597	conserved hypothetical protein without conserved domains; no signal sequence
e_gw1.11.1569.1	328108	2.2467	SAM-dependent methyltransferase, putative
Hetan1.Genemark.6275_g	105202	2.23945	predicted O-methyltransferase; similar to Phanerochaete chrysosporium 4-O-methyltransferase that preferentially catalyzes the methylation of 4-OH phenolic compounds like coniferyl alcohol, vanillyl alcohol and ferrulic acid. May play a role in promoting lignin degradation by methylating and inactivating free-hydroxyl phenolic compounds, products of lignin cleavage which are known inhibitors of li…
Hetan1.Genemark.7025_g	105952	2.23781	MFS sugar transporter, putative
Hetan1.EuGene12000503	164154	2.23191	conserved hypothetical protein without conserved domains; no signal peptide
gw1.01.3540.1	246583	2.22392	conserved hypothetical protein without conserved domains
e_gw1.07.1789.1	322098	2.19859	uroporphyrinogen III synthase (heme biosynthesis)
Hetan1.fgenesh2_pm.C_scaffold_1000163	121342	2.19777	CDF-like cation transporter
estExt_Genewise1.C_020773	379299	2.19655	NAD(P)/FAD-dependent oxidoreductase, putative
Hetan1.Genemark.7654_g	106581	2.19543	conserved hypothetical protein without conserved domains; no signal sequence
Hetan1.fgenesh2_pg.C_scaffold_3000250	115762	2.19375	Cytochrome P450 monooxygenase 93 (CYP5144); unknown function; no signal peptide
gw1.11.1733.1	245749	2.18527	putative ubiquitin carboxyl-terminal hydrolase; deubiquitinating enzyme
Hetan1.estExt_fgenesh3_kg.C_150057	149167	2.18071	hypothetical protein without conserved domains; no signal sequence
e_gw1.02.3541.1	309670	2.1803	JmjC domain-containing conserved protein; putative hydroxylase; no signal peptide; putative effector according to effectorP
estExt_Genemark.C_060542	459487	2.176	hypothetical protein without conserved domains; no signal sequence
Hetan1.Genemark.8097_g	107024	2.148	hypothetical protein without conserved domains; no signal peptide
Hetan1.fgenesh2_pg.C_scaffold_10000235	119286	2.13309	conserved hypothetical protein without conserved domains; no signal peptide
Genemark.5869_g	453041	2.13034	conserved hypothetical protein without conserved domains; no signal sequence
Hetan1.Genemark.3464_g	102391	2.12962	Putative lipase / acetyl esterase; no signal sequence
estExt_fgenesh1_kg.C_130076	442473	2.12597	hypothetical protein without conserved domains; no signal sequence
gw1.12.1494.1	244204	2.11423	mitochondrial export protein Som1, putative
Hetan1.estExt_fgenesh3_kg.C_100178	148361	2.08294	conserved hypothetical protein without conserved domains; no signal peptide
Hetan1.Genemark.789_g	99716	2.07738	hypothetical protein with DPBB motif; might have a role in plant cell wall binding; predicted as putative effector by effectorP
estExt_fgenesh1_pg.C_080170	445737	2.0716	GH47 glycoside hydrolase (candidate a-mannosidase)
Hetan1.e_gw1.3.1310.1	45250	2.04511	conserved hypothetical protein without conserved domains; no signal sequence
estExt_Genewise1Plus.C_120603	481455	2.0407	hypothetical conserved secreted protein without conserved domains
estExt_fgenesh1_pm.C_030530	433086	2.03134	serine/threonine kinase of the haspin family (involved in cell division and chromosome partitioning)
gw1.11.1785.1	247165	2.02359	conserved hypothetical protein without conserved domains; no signal sequence
e_gw1.08.2186.1	323441	2.00511	RPC4 subunit of RNA polymerase III
e_gw1.11.685.1	328172	1.9723	chromosome segregation protein SMC, putative
Hetan1.EuGene1000780	166699	1.95747	hypothetical protein without conserved domains; no signal peptide; putative effector according to effectorP
Genemark.366_g	447538	1.95693	hypothetical protein without conserved domains; no signal sequence
Hetan1.estExt_Genewise1.C_90448	37715	1.95598	GH53 glycoside hydrolase (candidate secreted endo-b-1,4-galactanase; has a predicted signal peptide)
estExt_fgenesh1_kg.C_100082	441715	1.9529	putative methyltransferase; might have a role in ubiquinone biosynthesis; no signal peptide; putative effector according to effectorP
Hetan1.EuGene4000162	170147	1.94988	hypothetical protein without conserved domains; no signal peptide; putative effector according to effectorP
Hetan1.estExt_Genewise1Plus.C_31274	61849	1.944	predicted secreted amidohydrolase
Genemark.8771_g	455943	1.9412	hypothetical secreted protein; predicted signal peptide; putative effector according to effectorP
fgenesh1_pm.06_#_573	418828	1.90223	conserved protein of the RNase H2 family; no signal sequence
estExt_Genewise1.C_091395	388434	1.89459	hypothetical protein without conserved domains; no signal sequence
fgenesh1_pm.12_#_40	422355	1.8862	conserved hypothetical protein without conserved domains; no signal sequence
gw1.09.1653.1	241720	1.8763	serine/threonine protein kinase
fgenesh1_pg.09_#_375	429320	1.85562	hypothetical protein without conserved domains; no signal sequence
Genemark.8943_g	456115	1.84338	hypothetical Zn-finger containing protein; no signal peptide
Hetan1.fgenesh2_pm.C_scaffold_9000058	125676	1.83973	GH28 glycoside hydrolase (related to rhamnogalacturonan a-L-rhamnopyranohydrolases)
Hetan1.Genemark.867_g	99794	1.82887	hypothetical protein without conserved domains; no signal peptide; putative effector according to effectorP
Hetan1.estExt_fgenesh2_pg.C_140245	153262	1.81924	hypothetical protein without conserved domains; no signal peptide
e_gw1.04.2312.1	315978	1.81788	cystein hydrolase, putative; no signal peptide
Hetan1.fgenesh2_pm.C_scaffold_8000210	125540	1.81675	Carbohydrate-Binding Module Family 1 protein; candidate cellulose-binding protein
e_gw1.06.364.1	320137	1.81622	uncharacterized protein with telomerase nad transcriptional regulator-specific domains
Hetan1.EuGene11000521	163550	1.77267	CE12 carbohydratae esterase (candidate secreted rhamnogalacturonan acetylesterase)
estExt_Genewise1Plus.C_062076	476959	1.77101	conserved uncharacterized protein with BTB domain; no signal peptide
Hetan1.Genemark.7827_g	106754	1.75809	nps3 protein similar to nonribosomal peptide synthase
fgenesh1_pg.02_#_228	424703	1.74883	Postreplication repair protein RAD18
Hetan1.YAI_EuGene16000107	181063	1.74677	laccase 12 (multicopper oxidase type 1)
gw1.08.1497.1	237117	1.74018	NAD(P)/FAD-dependent oxidoreductase, putative
fgenesh1_kg.01_#_141_#_1529_1_CCOZ_CCPA_CCPB_CCPC_EXTA	406665	1.72946	hypothetical secreted protein without conserved domains; putative effector according to effectorP
Hetan1.Genemark.7794_g	106721	1.7282	retrotransposon Gag protein
Hetan1.Genemark.3062_g	101989	1.72798	hypothetical protein with pterin-4-alpha-carbinolamine dehydratase domain; no signal peptide
estExt_fgenesh1_pg.C_020769	443851	1.72019	FAD-dependent phenol(?)oxidoreductase; no signal sequence
Hetan1.fgenesh2_pm.C_scaffold_10000114	125998	1.71874	radical SAM superfamily protein
e_gw1.01.2713.1	305962	1.7151	acyl-CoA-binding protein (ACBP) and ankyrin (ANK) domain-containing uncharacterized protein; no signal peptide
e_gw1.13.1420.1	330950	1.71338	conserved hypothetical protein without conserved domains; no signal peptide; putative effector according to effectorP
estExt_fgenesh1_kg.C_040485	439810	1.70934	salicylate 1-monooxygenase, putative
estExt_fgenesh1_kg.C_010060	437479	1.70767	hypothetical protein without conserved domains; no signal sequence; putative effector according to effectorP
Hetan1.Genemark.6765_g	105692	1.70277	conserved uncharacterized WD40 repeat domain-containing protein
fgenesh1_pg.07_#_222	428192	1.69194	hypothetical protein without conserved domains; no signal sequence
Hetan1.gw1.10.856.1	27192	1.66211	hydrophobic surface-binding protein A; has a predicted signal peptide
Hetan1.e_gw1.11.544.1	54556	1.66196	uncharacterized conserved TPR_12 and CHAT domain-containing protein; no signal peptide
fgenesh1_pm.05_#_404	417808	1.6367	hypothetical secreted protein without conserved domains; putative effector according to effectorP
Hetan1.Genemark.6536_g	105463	1.63465	LPMO (AA9 / GH61)
Hetan1.estExt_fgenesh2_pg.C_90353	152352	1.63376	uncharacterized protein without conserved domains; no signal sequence
fgenesh1_pg.05_#_626	427367	1.60525	conserved hypothetical protein; no signal peptide; putative effector according to effectorP
Genemark.164_g	447336	1.59152	conserved hypothetical protein without conserved domains; no signal sequence
Hetan1.Genemark.7055_g	105982	1.58978	hypothetical protein without conserved domains; no signal peptide; putative effector according to effectorP
e_gw1.08.1717.1	324478	1.58058	uncharacterized conserved protein with BTB/Poz domain; no signal peptide
Hetan1.Genemark.7078_g	106005	1.57936	secreted aspartic protease
Hetan1.Genemark.2365_g	101292	1.56774	hypothetical protein without conserved domains; no signal peptide; putative effector according to effectorP
Hetan1.Genemark.7586_g	106513	1.56445	uncharacterized protein without conserved domains; no signal sequence
Hetan1.estExt_fgenesh2_pg.C_120266	152933	1.56089	hypothetical protein without conserved domains; no signal sequence
estExt_fgenesh1_pg.C_010122	442874	1.55688	putative S-adenosylmethionine-dependent methyltransferase
Genemark.7475_g	454647	1.54793	conserved hypothetical protein without conserved domains; no signal peptide
e_gw1.06.1395.1	319641	1.53757	hypothetical protein without conserved domains; no signal peptide
Hetan1.fgenesh3_kg.9__74__0_0_CCPB2012.b1_CCOZ_CCPA_CCPB_CCPC_EXTA	143673	1.52374	hypothetical protein; no signal peptide; putative effector according to effectorP
estExt_fgenesh1_pm.C_050410	434205	1.51587	Nbl1_Borealin_N and DUF4045 domain-containing conserved protein; no signal peptide
Hetan1.Genemark.9449_g	108376	1.50791	manganese peroxidase 6, belongs to Fungal lignin peroxidases
Hetan1.EuGene11000045	163074	1.50314	hypothetical protein without conserved domains; no signal peptide; putative effector according to effectorP
Hetan1.estExt_Genewise1Plus.C_21896	61120	1.49707	Cytochrome P450 monooxygenase 91 (CYP5153); unknown function
Genemark.2512_g	449684	1.49303	uncharacterized protein without conserved domains; no signal sequence
fgenesh1_pg.09_#_268	429213	1.47457	PPR repeat domain containing protein of unknown function; no signal sequence
estExt_Genewise1.C_020866	379342	1.46411	putative flavin-binding monooxygenase
Genemark.7774_g	454946	1.45675	uncharacterized protein without conserved domains; no signal sequence
Hetan1.e_gw1.10.142.1	54234	1.45481	MFS transporter
e_gw1.11.1529.1	328638	1.44174	conserved hypothetical protein without conserved domains; predicted signal peptide
fgenesh1_pg.02_#_79	424554	1.43465	hypothetical protein without conserved domains; no signal sequence
fgenesh1_pg.08_#_190	428632	1.42775	hypothetical protein without conserved domains; no signal sequence
e_gw1.03.1409.1	313698	1.41924	RNA recognition motif (RRM) domain-containing protein; no signal peptide
estExt_Genewise1Plus.C_011290	468790	1.41114	conserved uncharacterized F-box domain-containing protein; no signal sequence
Hetan1.Genemark.9228_g	108155	1.402	putative protein kinase
e_gw1.03.400.1	313059	1.37726	ankyrin repeat-containing conserved protein of unknown function; no signal peptide
Hetan1.fgenesh2_pm.C_scaffold_2000613	122670	1.3726	S53 serine protease; predicted signal peptide
fgenesh1_pm.09_#_602	421111	1.36189	hypothetical protein without conserved domains; no signal sequence; putative effector according to effectorP
Hetan1.fgenesh2_pg.C_scaffold_14000114	120540	1.35503	hypothetical protein without conserved domains; no signal sequence
estExt_fgenesh1_pg.C_120122	446707	1.33763	Zn-finger containing protein; no signal peptide
Hetan1.EuGene12000016	163667	1.32603	MFS sugar transporter
estExt_Genewise1Plus.C_140669	482734	1.32323	hypothetical protein without conserved domains; no signal peptide; putative effector according to effectorP
Hetan1.estExt_fgenesh2_pg.C_30163	150414	1.28874	Cytochrome P450 monooxygenase 28 (CYP5144); unknown function
Hetan1.fgenesh2_pg.C_scaffold_12000318	120104	1.28657	serine peptidase S53; no signal peptide
Hetan1.EuGene10000067	162462	1.27952	hypothetical protein without conserved domains; no signal sequence; putative effector according to effectorP
fgenesh1_kg.05_#_123_#_5377_0_CCPC843.g1_CCOZ_CCPA_CCPB_CCPC_EXTA	409392	1.23051	hypothetical protein without conserved domains; no signal sequence
Hetan1.e_gw1.5.156.1	49239	1.20558	Cytochrome P450 monooxygenase 79 (CYP5344); unknown function; predicted secretion signal peptide
e_gw1.07.926.1	322960	1.18573	hypothetical protein without conserved domains; no signal peptide
Hetan1.fgenesh2_pg.C_scaffold_2000544	115317	1.18237	hypothetical protein without conserved domains; no signal sequence
estExt_fgenesh1_pm.C_100465	436352	1.17176	hypothetical protein without conserved domains; no signal sequence
e_gw1.11.1802.1	328569	1.17081	conserved hypothetical protein; no signal peptide; putative effector according to effectorP
estExt_Genewise1Plus.C_130999	482267	1.16303	putative RBR family protein; might have a role in protein quality control; putative effector according to effectorP
estExt_Genewise1.C_032736	382367	1.1581	hypothetical protein without conserved domains; no signal peptide; putative effector according to effectorP
Hetan1.Genemark.8216_g	107143	1.1299	uncharacterized protein with RNaseH domain
gw1.13.1278.1	243345	1.11246	hypothetical protein without conserved domains
Hetan1.EuGene15000210	165394	1.09956	putative uncharacterized kinase
e_gw1.07.2061.1	322342	1.08803	conserved hypothetical protein without conserved domains; no signal sequence
e_gw1.10.365.1	326455	1.05464	F-box domain containing hypothetical protein; no signal peptide
e_gw1.09.1026.1	325418	1.05289	hypothetical protein without conserved domains; no signal sequence; putative effector according to effectorP
Hetan1.dfl_YAI_gw1.8.895.1	181229	1.05142	LPMO (AA9 / GH61)
Hetan1.Genemark.3244_g	102171	1.04818	hypothetical protein without conserved domains; no signal sequence
Genemark.4630_g	451802	1.00843	hypothetical protein without conserved domains; no signal peptide; putative effector according to effectorP
Hetan1.Genemark.2406_g	101333	1.00513	hypothetical protein without conserved domains; no signal peptide; putative effector according to effectorP
Hetan1.gw1.3.1614.1	26301	1.00245	serine/threonine protein kinase, Pat1-like, putative
estExt_fgenesh1_kg.C_060269	440488	0.993968	uncharacterized hypothetical protein of Gti1/Pac2 family; no signal peptide; predicted effector according to effectorP
fgenesh1_pg.01_#_825	424471	0.974636	class I SAM-dependent methyltransferase; no signal peptide
fgenesh1_pg.01_#_585	424231	0.970627	putative coatomer alpha subunit
fgenesh1_pm.14_#_329	423596	0.949689	hypothetical protein without conserved domains; no signal peptide
e_gw1.09.916.1	325115	0.91492	conserved hypothetical protein without conserved domains; no signal sequence
e_gw1.09.263.1	326002	0.867975	hypothetical protein without conserved domains; no signal sequence
e_gw1.02.3503.1	309928	0.82218	ribosomal protein S2
Genemark.9153_g	456325	0.813528	uncharacterized protein without conserved domains; no signal sequence
Hetan1.estExt_fgenesh3_kg.C_50180	147202	0.811852	infection QTL expressed protein 1; no conserved domains; no signal peptide
e_gw1.10.538.1	326903	0.805235	conserved hypothetical protein without conserved domains
e_gw1.03.1459.1	311728	0.803192	uncharacterized hypothetical DUF1771 domain-containing protein; no signal sequence; putative effector according to effectorPHeterobasidion
fgenesh1_pg.03_#_715	425969	0.783723	hypothetical protein without conserved domains; no signal sequence
gw1.12.786.1	222332	0.768126	conserved hypothetical protein without conserved domains
gw1.08.1725.1	240447	0.723754	uncharacterized conserved ATP-binding protein: might be involved in DNA repair or recombination
Genemark.3645_g	450817	0.704551	conserved hypothetical protein without conserved domains; no signal peptide
estExt_Genewise1Plus.C_013208	470016	0.699091	hypothetical protein without conserved domains; no signal peptide
fgenesh1_pg.11_#_52	429843	0.69239	hypothetical protein with quinol monooxygenase conserved domain; no signal sequence; putative effector according to effectorP
gw1.03.3579.1	247562	0.6841	SMR domain-containing protein; likely involved in DNA mismatch repair
Genemark.9054_g	456226	0.661992	hypothetical protein without conserved domains; predicted signal peptide; putative effector according to effectorP
e_gw1.02.989.1	310228	0.650924	conserved hypothetical protein without conserved domains; no signal sequence
e_gw1.05.223.1	318964	0.640697	Clr2_transil domain-containing conserved protein; might have a role in transcriptional silencing and heterochromatin formation
e_gw1.07.854.1	322741	0.599243	conserved uncharacterized protein with Goodbye domain; no signal peptide
estExt_fgenesh1_pm.C_090567	436050	0.533178	hypothetical protein without conserved domains; no signal sequence
Genemark.5850_g	453022	0.497411	hypothetical protein without conserved domains; no signal sequence
Genemark.1145_g	448317	0.42848	hydrolase, putative
Hetan1.Genemark.5402_g	104329	0.370658	GH45 glycoside hydrolase gh45.1 (distantly related to endo-b-1,4-glucanases); predicted signal peptide
estExt_Genewise1Plus.C_091290	479489	0.367463	hypothetical protein without conserved domains; no signal sequence
fgenesh1_pm.01_#_543	413401	0.3661	meiotic recombinase Dmc1
Hetan1.Genemark.9913_g	108840	0.361041	PLC-like phosphodiesterase, putative; no signal peptide
gw1.07.2068.1	247120	0.322044	conserved hypothetical protein without conserved domains; no signal sequence
Hetan1.EuGene13000463	164744	0.289047	PH_Slm1 domain-containing protein; might have a role in the regulation of actin organization
fgenesh1_pg.03_#_209	425463	0.26623	hypothetical protein without conserved domains; no signal peptide
Hetan1.Genemark.5577_g	104504	0.259917	hypothetical protein without conserved domains; no signal peptide; putative effector according to effectorP
fgenesh1_pm.07_#_75	419214	0.250993	conserved hypothetical protein; putative endonuclease; no signal sequence
e_gw1.09.88.1	325629	0.215127	conserved hypothetical protein without conserved domains; no signal sequence
estExt_fgenesh1_kg.C_010178	437584	0.202019	tubulin-binding cofactor A, putative
Genemark.751_g	447923	0.184769	hypothetical protein; no signal peptide; putative effector according to effectorP
fgenesh1_pg.11_#_229	430020	0.101359	hypothetical protein without conserved domains; no signal peptide
Hetan1.EuGene9000567	174915	0.059268	hypothetical protein without conserved domains; no signal peptide
Genemark.8474_g	455646	0.030439	serine/threonine protein kinase
Genemark.6925_g	454097	0.0289369	hypothetical protein without conserved domains; no signal peptide
e_gw1.07.453.1	322676	0.0251365	hypothetical protein without conserved domains; no signal peptide
Hetan1.fgenesh2_pg.C_scaffold_16000041	120928	0.0086658	hypothetical protein without conserved domains; no signal sequence
fgenesh1_pg.08_#_280	428722	-0.0176786	hypothetical protein without conserved domains; no signal peptide; putative effector according to effectorP
gw1.02.3152.1	243308	-0.0200504	conserved hypothetical protein without conserved domains
Genemark.1102_g	448274	-0.0352084	uncharacterized protein without conserved domains; no signal sequence
fgenesh1_pm.01_#_607	413465	-0.0368907	uncharacterized nuclear transport factor 2 (NTF2) family protein with a SnoaL-like polyketide cyclase domain; predicted effector according to effectorP
estExt_Genewise1Plus.C_071439	477676	-0.077746	hypothetical protein without conserved domains; no signal peptide
e_gw1.09.1129.1	326023	-0.10658	hypothetical protein without conserved domains; no signal sequence
fgenesh1_pm.09_#_531	421040	-0.427752	hypothetical protein without conserved domains; no signal sequence
e_gw1.06.1255.1	319809	-0.609	protein model without a start codon; hypothetical protein without conserved domains; no signal sequence
Genemark.7058_g	454230	-0.673919	hypothetical protein without conserved domains; no signal sequence; putative effector according to effectorP
e_gw1.09.1478.1	326030	-1.1794	conserved hypothetical protein without conserved domains; no signal sequence

## Sheet: Table S1 Sheet2
Supplementary Table S1. List of Heterobasidion genes expressed during colonization of Norway spruce trees
MycoCosm gene model	Mycocosm protein number	Normalized transcript reads numbers
		A1	A2	A3	A4	A5	S1	S2	S3	S4	S5
e_gw1.09.1454.1	326350	1956.49	3639.56	8539.84	4427.27	1727.87	787.869	2673.11	2935.88	159.715	10955.1
Hetan1.e_gw1.13.787.1	56295	767.735	412.733	709.649	224.166	127.99	18425.2	447.591	135.502	42.0304	62.8399
Hetan1.estExt_fgenesh2_pm.C_120271	157474	470.547	1782.26	853.984	1232.91	479.963	54.0694	1454.67	903.348	75.6547	1026.39
estExt_Genewise1.C_091291	388390	990.626	731.664	998.319	476.352	1087.92	42.4831	857.883	112.918	42.0304	62.8399
fgenesh1_pg.09_#_277	429222	470.547	1388.28	721.677	644.477	927.929	42.4831	534.623	67.7511	16.8122	146.626
Hetan1.Genemark.10114_g	109041	594.376	619.1	733.705	364.269	735.944	13.7319	372.992	112.918	33.6243	104.733
estExt_Genemark.C_090448	460426	148.594	712.903	396.922	392.29	447.966	14.161	360.559	90.3348	33.6243	209.466
Genemark.7009_g	454181	24.7657	300.17	156.363	1765.31	31.9975	12.8737	0	271.004	0	0
fgenesh1_pg.09_#_403	429348	371.485	487.776	264.615	168.124	511.961	18.0231	285.961	0	16.8122	146.626
estExt_Genewise1.C_022928	380619	0	0	36.0838	28.0207	0	1107.14	12.4331	22.5837	0	0
Hetan1.Genemark.10041_g	108968	247.657	168.845	204.475	56.0415	255.98	5.57859	62.1654	45.1674	0	20.9466
fgenesh1_kg.09_#_296_#_4279_0_CCOZ1209.g1_CCOZ_CCPA_CCPB_CCPC_EXTA	411348	99.0626	75.0424	72.1677	84.0622	159.988	1.28737	136.764	45.1674	0	41.8933
estExt_Genewise1.C_091381	388424	222.891	168.845	348.81	56.0415	0	14.5902	87.0316	67.7511	8.40608	20.9466
Hetan1.estExt_fgenesh2_pm.C_160021	157870	123.828	206.367	120.279	280.207	0	42.4831	24.8662	971.099	100.873	314.2
Hetan1.estExt_Genewise1Plus.C_160062	68367	0	93.803	120.279	140.104	95.9926	24.0309	99.4647	67.7511	0	20.9466
e_gw1.09.1457.1	325996	24.7657	168.845	48.1118	252.187	223.983	52.7821	124.331	22.5837	16.8122	20.9466
Hetan1.Genemark.7165_g	106092	0	0	12.0279	0	63.9951	85.8245	12.4331	22.5837	0	0
fgenesh1_pg.09_#_318	429263	24.7657	75.0424	276.643	28.0207	0	3.8621	0	0	8.40608	41.8933
Hetan1.e_gw1.1.156.1	42568	0	0	24.0559	0	0	70.3761	0	0	8.40608	20.9466
Hetan1.AOL_EuGene18000072	181114	0	0	0	0	0	91.8322	0	0	0	0
Hetan1.EuGene15000142	165326	0	0	0	0	0	72.9508	12.4331	0	0	0
estExt_Genewise1Plus.C_091344	479507	24.7657	75.0424	72.1677	28.0207	95.9926	21.8852	49.7323	45.1674	0	0
Genemark.3046_g	450218	0	0	12.0279	0	0	74.2382	0	0	0	0
Hetan1.estExt_Genewise1.C_50840	35648	0	0	0	0	0	69.947	0	0	0	0
e_gw1.07.1957.1	322477	24.7657	56.2818	12.0279	0	0	58.3607	0	0	8.40608	0
fgenesh1_pm.12_#_439	422754	0	0	0	0	0	65.6557	0	0	0	0
Hetan1.estExt_Genewise1Plus.C_70101	64706	0	0	0	0	0	66.0849	12.4331	0	0	0
Genemark.7183_g	454355	0	0	36.0838	0	0	33.0424	0	0	8.40608	83.7866
e_gw1.09.151.1	325318	24.7657	131.324	96.2236	0	63.9951	4.29122	49.7323	0	0	20.9466
Hetan1.fgenesh2_pm.C_scaffold_12000009	126495	24.7657	0	12.0279	0	0	65.6557	0	0	0	0
Hetan1.e_gw1.3.233.1	46257	0	0	0	0	0	66.0849	0	0	0	0
estExt_Genewise1Plus.C_091360	479514	99.0626	131.324	72.1677	0	31.9975	31.7551	12.4331	22.5837	8.40608	0
Hetan1.estExt_Genewise1Plus.C_80406	65511	0	0	0	0	0	45.487	0	0	0	0
e_gw1.03.2790.1	313499	0	0	0	0	0	35.6172	0	0	0	0
Hetan1.fgenesh2_pg.C_scaffold_8000100	118397	0	0	0	0	0	52.3529	12.4331	0	0	0
e_gw1.05.1703.1	318347	0	0	0	0	0	36.0463	0	0	0	0
Hetan1.e_gw1.9.122.1	53076	0	0	0	0	0	34.3298	0	22.5837	0	0
e_gw1.07.1664.1	321457	0	0	0	0	0	26.1765	12.4331	22.5837	0	0
Hetan1.e_gw1.9.966.1	52869	0	0	12.0279	0	0	38.1919	0	0	0	0
Genemark.8463_g	455635	0	0	12.0279	0	0	146.331	12.4331	0	0	0
estExt_Genewise1Plus.C_021820	471025	0	0	0	0	0	41.1958	24.8662	0	0	0
estExt_fgenesh1_pg.C_120269	446792	0	0	0	0	0	58.3607	12.4331	0	0	0
estExt_Genewise1.C_010098	377052	0	0	0	0	0	43.3414	0	0	0	0
e_gw1.02.3690.1	309932	0	0	0	0	0	38.1919	0	0	0	0
Hetan1.estExt_Genewise1Plus.C_40721	62665	24.7657	0	24.0559	0	0	27.4638	12.4331	0	0	0
gw1.01.3238.1	244643	0	0	12.0279	0	0	45.0579	0	0	0	0
estExt_Genewise1.C_091331	388401	49.5313	37.5212	24.0559	28.0207	31.9975	3.43298	12.4331	67.7511	8.40608	125.68
e_gw1.03.3132.1	313873	0	18.7606	0	0	0	130.024	24.8662	0	0	0
fgenesh1_kg.09_#_366_#_116252	411418	0	187.606	36.0838	28.0207	31.9975	2.14561	62.1654	0	0	0
e_gw1.02.3018.1	311041	0	0	12.0279	0	0	55.7859	0	22.5837	0	0
e_gw1.05.86.1	318776	0	0	0	0	0	48.92	0	0	0	0
Hetan1.EuGene4000484	170469	0	0	0	0	0	53.6403	0	0	0	0
e_gw1.11.1662.1	328280	0	0	0	0	0	58.7898	0	0	0	0
Hetan1.estExt_fgenesh2_pm.C_120261	157466	0	0	12.0279	0	0	38.621	0	0	0	0
estExt_Genemark.C_140073	461411	0	0	0	0	0	40.7666	0	0	0	0
fgenesh1_kg.02_#_340_#_3331_1_CCOZ_CCPA_CCPB_CCPC_EXTA	407642	0	0	0	0	0	30.8968	0	0	0	0
estExt_fgenesh1_pm.C_060729	434890	0	0	0	0	0	33.0424	0	0	0	0
estExt_Genewise1.C_130205	390749	0	0	0	0	0	31.7551	0	22.5837	0	0
estExt_fgenesh1_pg.C_040550	444674	0	0	0	0	0	30.8968	0	0	0	0
estExt_fgenesh1_pm.C_020712	432447	0	0	0	0	0	30.4677	0	0	0	0
fgenesh1_pg.03_#_439	425693	0	0	0	0	0	28.3221	12.4331	0	0	0
Hetan1.fgenesh2_pm.C_scaffold_10000224	126108	0	0	0	0	0	37.7628	0	0	0	0
gw1.06.2469.1	247000	0	0	0	0	0	49.3491	0	0	0	0
estExt_fgenesh1_pg.C_140020	447024	0	0	12.0279	0	0	30.0386	0	0	0	0
estExt_fgenesh1_pg.C_110392	446619	24.7657	0	12.0279	0	0	40.3375	0	0	0	0
Hetan1.estExt_Genewise1Plus.C_90100	65781	0	18.7606	0	0	0	36.0463	0	0	0	0
Hetan1.estExt_Genewise1Plus.C_160017	68332	49.5313	225.127	84.1956	28.0207	191.985	9.44069	24.8662	0	0	20.9466
estExt_fgenesh1_kg.C_050191	439974	0	0	0	0	0	31.7551	0	0	0	0
Hetan1.Genemark.8846_g	107773	0	0	0	0	0	41.6249	12.4331	0	0	0
Genemark.8739_g	455911	0	0	0	0	0	43.7705	0	22.5837	0	0
Hetan1.e_gw1.1.1882.1	41952	0	0	0	0	0	31.3259	0	0	16.8122	0
gw1.01.3697.1	247725	0	0	0	0	0	31.7551	0	0	0	0
Hetan1.e_gw1.14.286.1	57288	0	0	0	0	0	29.1803	0	0	0	0
Hetan1.AOL_estExt_fgenesh2_pg.C_10080	181091	0	18.7606	0	0	0	27.893	0	0	0	0
fgenesh1_pg.05_#_166	426907	0	0	0	0	0	28.3221	0	0	0	0
Hetan1.EuGene12000286	163937	0	0	0	0	0	28.3221	0	0	0	0
e_gw1.01.3403.1	308185	0	0	0	0	0	35.6172	0	0	0	0
e_gw1.03.1553.1	314580	0	0	0	0	0	29.6094	0	0	0	0
Hetan1.Genemark.2685_g	101612	74.297	0	0	0	0	36.0463	0	0	0	0
e_gw1.01.2627.1	307924	0	0	0	0	0	51.9238	0	0	0	0
Hetan1.Genemark.2653_g	101580	0	0	0	0	0	37.3337	0	0	0	0
Hetan1.estExt_Genewise1Plus.C_120793	67557	148.594	56.2818	192.447	0	0	32.6133	12.4331	67.7511	8.40608	460.826
Hetan1.estExt_fgenesh2_pm.C_80250	156632	0	0	0	0	0	31.7551	0	0	0	0
estExt_fgenesh1_pm.C_130317	437163	0	0	0	0	0	36.9045	0	0	0	0
Hetan1.estExt_fgenesh2_pm.C_20209	154277	0	0	0	0	0	27.893	0	0	0	0
Hetan1.estExt_Genewise1Plus.C_31516	61998	0	0	0	0	0	35.188	0	0	0	0
Hetan1.Genemark.10080_g	109007	49.5313	18.7606	24.0559	56.0415	31.9975	8.58245	62.1654	45.1674	0	0
gw1.06.2199.1	243963	0	0	0	0	0	27.893	0	0	0	0
estExt_fgenesh1_pm.C_070246	435080	0	0	0	0	0	34.3298	0	0	0	0
Hetan1.Genemark.9654_g	108581	0	0	12.0279	0	0	25.7473	0	0	0	0
Hetan1.estExt_fgenesh3_kg.C_60018	147230	0	0	0	0	0	35.188	0	0	0	0
fgenesh1_pm.06_#_582	418837	0	0	0	0	0	48.92	0	0	0	0
Hetan1.estExt_fgenesh2_pg.C_100320	152543	0	0	0	0	0	42.054	0	0	0	0
estExt_Genewise1.C_011123	377629	0	0	0	0	0	31.7551	0	0	0	0
e_gw1.03.3524.1	314245	0	0	0	0	0	27.893	0	0	0	0
estExt_fgenesh1_pg.C_020365	443574	0	0	0	0	0	23.6017	0	0	0	0
e_gw1.05.2095.1	317029	0	0	0	0	0	24.0309	0	0	0	0
Hetan1.EuGene2000349	167763	0	0	0	0	0	24.0309	0	0	0	0
Hetan1.Genemark.7488_g	106415	0	0	0	0	0	29.1803	0	0	0	0
gw1.02.3244.1	244339	0	0	0	0	0	44.6287	0	0	0	0
Hetan1.EuGene16000052	165527	49.5313	75.0424	84.1956	56.0415	191.985	27.4638	62.1654	22.5837	0	20.9466
estExt_Genemark.C_070328	459750	24.7657	0	0	0	0	25.3182	0	0	0	0
Hetan1.fgenesh2_pm.C_scaffold_10000094	125978	0	0	0	0	0	32.6133	0	0	0	0
estExt_Genewise1Plus.C_060793	476210	0	0	0	0	0	22.7435	0	0	0	0
Hetan1.estExt_fgenesh2_pg.C_160094	153387	24.7657	0	12.0279	28.0207	31.9975	21.4561	12.4331	0	0	0
Genemark.2132_g	449304	0	0	0	0	0	32.1842	0	0	0	0
estExt_Genewise1.C_110034	389267	0	0	0	0	0	30.0386	0	0	0	0
Hetan1.fgenesh2_pg.C_scaffold_16000018	120905	24.7657	56.2818	60.1397	56.0415	31.9975	3.00386	37.2992	0	0	20.9466
Hetan1.gw1.8.131.1	11056	0	0	0	0	0	29.6094	0	0	16.8122	0
e_gw1.04.2619.1	315128	0	0	0	0	0	42.9122	0	0	0	0
Hetan1.e_gw1.2.216.1	44412	0	0	0	0	0	34.3298	0	0	0	0
Hetan1.estExt_fgenesh3_kg.C_170022	149241	0	0	12.0279	0	0	24.0309	0	0	0	0
e_gw1.01.1649.1	305492	49.5313	18.7606	0	0	0	23.6017	0	22.5837	0	0
Hetan1.fgenesh2_pm.C_scaffold_12000304	126790	24.7657	131.324	60.1397	28.0207	0	3.43298	12.4331	22.5837	0	0
fgenesh1_pg.08_#_133	428575	0	0	12.0279	0	0	27.0347	0	0	0	0
Hetan1.Genemark.7583_g	106510	0	0	0	0	0	23.6017	0	0	0	0
estExt_fgenesh1_pm.C_040315	433642	0	0	0	0	0	21.027	0	0	0	0
fgenesh1_pm.08_#_654	420426	0	0	0	0	0	21.027	0	0	0	0
estExt_fgenesh1_kg.C_070156	440794	0	0	0	0	0	21.027	0	0	0	0
Hetan1.Genemark.10113_g	109040	173.36	112.564	48.1118	168.124	0	0.858245	24.8662	361.339	142.903	41.8933
gw1.08.1564.1	238047	0	0	0	0	0	23.1726	0	0	0	0
Hetan1.estExt_Genewise1Plus.C_71026	65272	0	0	0	0	0	19.3105	0	0	0	20.9466
Hetan1.e_gw1.6.1261.1	50287	0	0	0	0	0	41.6249	0	0	0	0
Hetan1.T_R_EuGene3000949	181084	0	0	0	0	0	26.1765	0	0	0	0
Hetan1.EuGene4000170	170155	0	0	0	0	0	22.3144	0	0	0	0
Hetan1.estExt_Genewise1Plus.C_90795	66116	24.7657	0	36.0838	0	0	23.1726	0	0	0	0
Hetan1.estExt_Genewise1Plus.C_130484	67832	0	0	12.0279	0	0	36.0463	0	0	0	0
Hetan1.e_gw1.1.398.1	41260	0	0	0	0	0	29.6094	0	0	0	0
fgenesh1_pm.03_#_736	416053	0	0	0	0	0	21.027	0	0	0	0
estExt_Genewise1.C_012433	378489	0	0	0	0	0	19.7396	0	0	0	0
estExt_Genewise1.C_140326	391413	0	0	0	0	0	38.621	0	0	0	0
estExt_fgenesh1_pg.C_080351	445856	0	0	0	0	0	23.1726	0	0	0	0
fgenesh1_pm.01_#_157	413015	0	0	0	0	0	20.1688	0	0	0	0
Hetan1.estExt_fgenesh3_kg.C_80131	147917	0	0	0	0	0	19.7396	0	0	0	0
gw1.08.1700.1	240083	0	0	0	0	0	21.027	0	0	0	0
Hetan1.EuGene7000302	173241	0	0	0	0	0	23.6017	0	0	0	0
Hetan1.gw1.10.593.1	21632	0	0	0	0	0	31.7551	0	0	0	0
Genemark.643_g	447815	0	18.7606	0	0	0	70.8052	0	45.1674	0	0
fgenesh1_pm.02_#_338	414451	0	0	0	0	0	24.8891	0	0	0	0
Hetan1.fgenesh2_pm.C_scaffold_2000055	122112	0	0	0	0	0	21.8852	0	0	0	0
e_gw1.06.1762.1	319562	0	0	0	0	0	18.8814	0	0	0	0
fgenesh1_pg.05_#_391	427132	0	0	0	0	0	18.8814	0	0	0	0
Hetan1.EuGene10000418	162813	0	0	0	0	0	21.4561	0	0	0	0
estExt_Genewise1Plus.C_010701	468407	24.7657	0	0	0	0	18.8814	0	0	0	0
Hetan1.Genemark.3101_g	102028	0	0	0	0	0	20.5979	0	0	0	0
fgenesh1_pg.11_#_363	430154	0	0	36.0838	0	0	22.3144	0	0	0	0
estExt_Genewise1Plus.C_061448	476581	0	0	0	0	0	18.8814	0	0	0	0
e_gw1.06.1912.1	319489	0	18.7606	0	0	0	30.0386	0	0	0	0
e_gw1.09.1584.1	326185	0	0	0	0	0	18.4523	0	0	0	0
Hetan1.estExt_Genewise1Plus.C_21744	61042	0	0	0	0	0	24.0309	0	0	0	0
Hetan1.e_gw1.6.707.1	50265	0	0	0	0	0	21.8852	0	0	0	0
e_gw1.01.1810.1	305990	0	0	0	0	0	20.5979	12.4331	0	0	0
Hetan1.estExt_Genewise1.C_140270	39756	0	0	0	0	0	28.7512	0	0	0	0
gw1.01.1591.1	235157	0	0	0	0	0	17.1649	0	0	0	0
Hetan1.EuGene7000124	173063	0	0	0	0	0	19.3105	0	0	0	0
fgenesh1_pm.14_#_246	423513	0	0	0	0	0	18.0231	0	0	0	0
Hetan1.EuGene14000300	165050	0	0	0	0	0	19.3105	0	0	0	20.9466
fgenesh1_pm.09_#_423	420932	0	0	0	0	0	17.594	0	0	0	0
Genemark.2840_g	450012	0	0	0	0	0	17.1649	0	0	0	0
estExt_Genewise1.C_051530	384428	0	0	0	0	0	18.8814	0	0	0	0
Hetan1.dfl_e_gw1.13.150.1	181227	0	0	0	0	0	26.6056	0	0	0	20.9466
Hetan1.fgenesh3_kg.2__382__4800_1_CCOZ_CCPA_CCPB_CCPC_EXTA	141440	0	0	0	0	0	31.7551	0	0	0	0
Hetan1.estExt_Genewise1Plus.C_100197	66253	0	0	0	0	0	16.7358	0	0	8.40608	0
Hetan1.estExt_fgenesh2_pm.C_20282	154323	0	0	0	0	0	20.5979	0	0	0	0
Hetan1.estExt_fgenesh2_pm.C_140047	157680	0	0	0	0	0	20.1688	0	0	0	0
Hetan1.Genemark.6224_g	105151	0	0	24.0559	0	0	30.8968	0	0	0	0
e_gw1.13.1052.1	331125	0	0	12.0279	0	0	25.7473	0	0	0	0
Hetan1.e_gw1.14.508.1	57301	0	0	0	0	0	19.7396	0	0	0	0
estExt_fgenesh1_pm.C_010567	431549	0	0	0	0	0	19.7396	0	0	0	0
Hetan1.estExt_Genewise1Plus.C_80202	65385	0	0	12.0279	0	0	29.6094	0	0	0	0
estExt_Genewise1.C_080068	386706	0	0	0	0	0	21.027	0	0	0	0
Hetan1.Genemark.4871_g	103798	0	0	0	0	0	20.1688	0	0	0	0
Hetan1.estExt_Genewise1Plus.C_40152	62302	0	0	0	0	0	17.594	0	0	0	0
Hetan1.fgenesh2_pm.C_scaffold_4000468	123886	0	0	0	0	0	20.1688	0	0	0	0
Hetan1.fgenesh2_pg.C_scaffold_3000302	115814	0	0	0	0	0	29.1803	0	0	0	0
Hetan1.e_gw1.1.487.1	41624	0	0	0	0	0	22.3144	0	0	0	41.8933
fgenesh1_pg.14_#_117	431021	0	0	0	0	0	18.4523	0	0	0	0
e_gw1.09.1900.1	325386	0	18.7606	60.1397	28.0207	63.9951	2.14561	0	45.1674	0	41.8933
estExt_Genewise1Plus.C_090591	479129	0	0	0	0	0	14.161	0	0	0	20.9466
estExt_Genewise1Plus.C_031358	472613	0	0	0	0	0	16.3067	0	0	0	0
Hetan1.e_gw1.7.779.1	51586	0	0	0	0	0	19.3105	0	0	0	0
gw1.08.2000.1	244395	0	0	0	0	0	17.1649	0	0	0	0
Hetan1.e_gw1.16.222.1	57931	24.7657	112.564	12.0279	0	0	14.161	12.4331	0	0	0
estExt_fgenesh1_pg.C_140248	447153	0	0	24.0559	0	0	15.0193	0	0	0	0
Hetan1.estExt_Genewise1Plus.C_20287	60114	0	0	48.1118	0	0	19.7396	0	0	0	0
e_gw1.05.742.1	318940	0	0	0	0	0	31.3259	0	0	0	0
estExt_fgenesh1_pm.C_010875	431773	0	0	0	0	0	23.1726	0	0	0	0
Hetan1.dfl_EuGene1000506	181245	0	0	0	0	0	18.0231	0	0	0	0
Hetan1.e_gw1.4.255.1	48060	0	0	0	28.0207	0	15.4484	0	0	0	0
estExt_fgenesh1_kg.C_050016	439831	0	0	0	0	0	18.8814	0	0	0	0
estExt_Genemark.C_010017	456537	0	0	0	0	0	29.6094	0	0	0	0
estExt_Genewise1Plus.C_071352	477650	0	0	0	0	0	19.3105	0	0	0	0
Hetan1.dfl_EuGene3000986	181235	0	0	0	0	0	16.7358	12.4331	0	0	0
fgenesh1_kg.09_#_300_#_144896	411352	0	18.7606	12.0279	0	0	38.621	0	22.5837	8.40608	20.9466
estExt_Genewise1.C_020290	379105	0	0	0	0	0	14.161	0	0	0	0
fgenesh1_pm.06_#_813	419068	0	0	0	0	0	17.1649	0	0	0	0
Hetan1.Genemark.8128_g	107055	24.7657	0	0	0	0	15.0193	0	0	0	0
Hetan1.fgenesh2_pg.C_scaffold_3000213	115725	0	0	0	0	0	20.5979	0	0	0	0
Hetan1.EuGene7000448	173387	0	0	0	0	0	16.7358	0	0	0	0
fgenesh1_pg.05_#_390	427131	0	0	0	0	0	25.7473	0	0	0	0
Hetan1.fgenesh2_pg.C_scaffold_12000342	120128	24.7657	0	24.0559	56.0415	0	5.14947	12.4331	22.5837	33.6243	20.9466
Hetan1.e_gw1.11.1127.1	54511	0	0	0	0	0	18.0231	0	0	0	0
Genemark.6106_g	453278	0	0	0	0	0	15.4484	0	0	0	0
e_gw1.09.790.1	325669	0	0	0	0	0	20.1688	0	0	0	0
Hetan1.gw1.5.136.1	11198	0	0	0	0	0	13.7319	0	0	0	0
e_gw1.05.338.1	318593	0	0	0	0	0	14.5902	0	0	0	0
Hetan1.EuGene9000118	174466	0	0	24.0559	0	31.9975	39.4793	0	0	0	0
fgenesh1_pg.14_#_26	430930	0	0	0	0	0	13.3028	0	0	0	0
e_gw1.02.2812.1	309297	0	0	0	0	0	14.161	0	0	0	0
Hetan1.e_gw1.5.197.1	49589	0	0	0	0	0	14.161	0	0	0	0
estExt_fgenesh1_pg.C_030300	444047	0	0	0	0	0	17.1649	0	0	0	0
estExt_Genewise1.C_010405	377159	0	0	0	0	0	17.594	0	0	0	0
Hetan1.Genemark.7250_g	106177	0	0	0	0	0	26.6056	0	0	0	0
estExt_Genewise1Plus.C_070756	477348	0	0	0	0	0	20.1688	0	0	0	0
fgenesh1_kg.12_#_87_#_4482_1_CCOZ_CCPA_CCPB_CCPC_EXTA	412167	0	0	0	0	0	14.161	0	0	0	0
Hetan1.EuGene8000428	174127	0	0	0	0	0	20.5979	0	0	0	0
estExt_Genewise1Plus.C_030432	471990	0	0	0	0	0	12.8737	0	0	0	0
Hetan1.e_gw1.16.104.1	57899	123.828	0	12.0279	56.0415	95.9926	2.57473	49.7323	203.253	8.40608	41.8933
e_gw1.09.1111.1	325139	24.7657	37.5212	0	28.0207	0	1.71649	62.1654	22.5837	0	20.9466
Hetan1.Genemark.8663_g	107590	0	0	0	0	0	12.0154	0	0	0	0
estExt_fgenesh1_pm.C_090517	436026	24.7657	93.803	96.2236	0	95.9926	1.28737	0	22.5837	16.8122	20.9466
Hetan1.EuGene12000294	163945	0	18.7606	0	0	0	19.3105	0	0	0	0
estExt_Genewise1.C_090476	387972	0	18.7606	0	0	0	27.0347	0	45.1674	0	0
Hetan1.estExt_fgenesh2_pm.C_40659	155557	0	0	0	0	0	12.8737	0	0	0	0
gw1.02.3652.1	247745	49.5313	0	0	0	0	33.9007	0	0	0	0
e_gw1.01.3519.1	308369	0	0	0	0	0	16.3067	0	0	0	0
Hetan1.estExt_fgenesh2_pm.C_130063	157537	0	56.2818	96.2236	0	0	7.29508	0	22.5837	0	0
estExt_Genewise1.C_091105	388307	0	0	12.0279	0	0	21.027	12.4331	0	0	41.8933
Hetan1.EuGene7000680	173619	0	0	0	0	0	10.7281	0	0	0	0
estExt_fgenesh1_kg.C_080384	441277	0	0	0	0	0	12.0154	0	0	0	0
Hetan1.EuGene14000316	165066	24.7657	18.7606	24.0559	0	0	19.7396	0	0	0	0
Genemark.8647_g	455819	0	0	0	0	0	15.0193	0	0	0	0
Hetan1.e_gw1.6.1360.1	50880	0	0	0	0	0	13.3028	0	0	0	0
e_gw1.05.1830.1	317013	0	0	12.0279	0	0	13.3028	0	0	0	0
Hetan1.e_gw1.9.634.1	53286	0	0	0	0	0	30.0386	0	0	16.8122	0
estExt_Genewise1.C_060218	384845	0	0	0	0	0	12.4446	0	0	0	0
Hetan1.estExt_Genewise1.C_70106	36460	0	0	0	0	0	11.1572	0	0	0	0
fgenesh1_pm.09_#_232	420741	0	0	0	0	0	11.5863	0	0	0	0
estExt_Genemark.C_090501	460446	0	112.564	24.0559	28.0207	0	1.71649	12.4331	0	0	0
Hetan1.e_gw1.16.116.1	57977	49.5313	18.7606	60.1397	0	95.9926	11.1572	49.7323	0	0	20.9466
estExt_Genewise1.C_031698	381745	0	0	0	0	0	9.86982	0	0	0	0
Hetan1.fgenesh2_pm.C_scaffold_10000173	126057	24.7657	0	12.0279	0	0	26.1765	0	0	0	0
Hetan1.estExt_fgenesh2_pm.C_70118	156243	0	0	0	0	0	10.2989	0	0	0	0
Hetan1.estExt_Genewise1Plus.C_31603	62063	0	18.7606	12.0279	0	0	22.3144	0	0	0	0
Hetan1.Genemark.7307_g	106234	0	0	0	0	0	29.6094	0	22.5837	0	0
Hetan1.estExt_fgenesh2_pg.C_170070	153422	24.7657	0	12.0279	0	0	21.027	0	0	0	0
estExt_fgenesh1_pg.C_030456	444158	0	0	0	0	0	11.1572	0	0	0	0
Hetan1.EuGene7000278	173217	0	0	0	0	0	17.594	0	0	0	0
Genemark.5344_g	452516	0	0	0	0	0	10.7281	0	0	0	0
e_gw1.07.2096.1	321959	0	0	0	0	0	12.4446	0	0	0	0
fgenesh1_pg.09_#_354	429299	24.7657	18.7606	0	0	31.9975	1.71649	0	22.5837	0	104.733
Hetan1.e_gw1.14.242.1	56987	24.7657	0	0	0	0	27.893	0	0	0	0
e_gw1.07.2031.1	322385	0	0	24.0559	0	0	17.594	0	0	0	0
Hetan1.e_gw1.9.25.1	53480	0	0	0	0	0	9.44069	0	0	0	0
fgenesh1_pm.09_#_472	420981	0	37.5212	48.1118	0	31.9975	0	24.8662	0	0	20.9466
Hetan1.EuGene4000587	170572	0	0	0	0	0	9.01157	0	0	0	0
e_gw1.12.629.1	329692	0	0	12.0279	0	0	23.1726	12.4331	0	0	0
Genemark.4435_g	451607	0	0	0	0	0	14.5902	0	0	0	0
estExt_fgenesh1_pm.C_060448	434715	0	0	0	0	0	8.58245	0	0	0	0
Genemark.8714_g	455886	0	0	0	0	0	9.01157	0	0	0	0
e_gw1.03.2755.1	314160	0	0	0	0	0	9.44069	0	0	0	0
Hetan1.estExt_Genewise1.C_120774	39263	0	0	36.0838	28.0207	0	10.2989	0	0	0	0
e_gw1.09.671.1	325078	0	56.2818	12.0279	28.0207	0	0.429122	12.4331	22.5837	0	41.8933
Hetan1.Genemark.9921_g	108848	0	0	0	0	0	10.7281	0	0	0	0
Hetan1.fgenesh2_pg.C_scaffold_3000096	115608	0	0	0	0	0	24.0309	0	0	0	0
estExt_Genewise1Plus.C_012758	469770	0	0	0	0	0	15.0193	0	0	0	0
fgenesh1_pm.05_#_306	417710	0	0	0	0	0	8.58245	0	0	0	0
e_gw1.09.1669.1	325746	0	0	0	0	0	15.4484	0	0	0	0
e_gw1.08.1748.1	324769	0	0	0	0	0	15.0193	0	0	0	0
Hetan1.e_gw1.14.150.1	57468	49.5313	0	0	0	0	15.0193	0	0	0	0
e_gw1.08.422.1	323009	0	37.5212	0	28.0207	0	18.0231	0	0	0	0
Hetan1.Genemark.7162_g	106089	99.0626	0	48.1118	0	0	80.675	12.4331	67.7511	0	0
fgenesh1_kg.01_#_9_#_2650_1_CCOZ_CCPA_CCPB_CCPC_EXTA	406533	0	0	0	0	0	23.6017	0	0	0	0
Genemark.7412_g	454584	0	0	0	0	0	13.7319	0	0	0	0
Hetan1.fgenesh2_pm.C_scaffold_12000294	126780	0	93.803	120.279	28.0207	0	24.46	0	0	0	0
Hetan1.EuGene9000038	174386	0	0	0	0	0	8.58245	0	0	0	0
estExt_Genewise1Plus.C_140340	482531	0	0	0	0	0	13.3028	0	0	0	0
Hetan1.e_gw1.6.1039.1	50850	0	0	0	0	0	15.4484	12.4331	0	0	0
Hetan1.estExt_Genewise1.C_70859	36931	0	0	0	0	0	7.7242	0	0	0	0
Hetan1.EuGene14000151	164901	0	0	0	0	0	15.0193	0	0	0	0
estExt_Genewise1Plus.C_032335	473230	0	0	0	0	0	21.8852	0	0	0	0
estExt_fgenesh1_kg.C_030129	438837	0	0	0	0	0	7.7242	0	0	0	0
Genemark.4097_g	451269	0	0	0	0	0	9.01157	0	0	0	0
Hetan1.fgenesh2_pg.C_scaffold_13000076	120219	0	0	0	0	0	8.15333	0	0	0	0
Hetan1.Genemark.3665_g	102592	0	0	0	0	0	11.5863	0	0	0	20.9466
Hetan1.EuGene3001019	169743	0	18.7606	0	28.0207	0	18.8814	0	0	0	0
Hetan1.gw1.1.1082.1	17676	0	0	0	0	0	12.4446	0	0	0	0
Hetan1.YAI_EuGene9000355	181068	148.594	75.0424	132.307	28.0207	0	49.7782	0	0	8.40608	0
estExt_Genewise1Plus.C_032365	473249	0	0	0	0	0	14.161	0	0	0	0
Hetan1.estExt_Genewise1Plus.C_70589	64994	24.7657	37.5212	12.0279	0	0	7.29508	0	22.5837	0	0
estExt_Genewise1Plus.C_120408	481340	0	0	0	0	0	12.4446	0	0	0	20.9466
Hetan1.e_gw1.12.717.1	55937	0	0	0	0	0	13.3028	0	0	0	0
Hetan1.estExt_fgenesh2_pg.C_50155	151266	0	0	0	0	0	16.3067	0	0	0	0
fgenesh1_kg.12_#_254_#_2095_1_CCOZ_CCPA_CCPB_CCPC_EXTA	412334	0	0	0	0	0	15.0193	0	0	0	0
Hetan1.EuGene12000554	164205	24.7657	131.324	96.2236	28.0207	0	8.15333	49.7323	0	0	0
e_gw1.05.1205.1	318841	0	0	0	28.0207	0	11.1572	0	0	0	0
Hetan1.EuGene12000437	164088	24.7657	18.7606	0	0	0	4.72035	62.1654	0	0	0
fgenesh1_pg.05_#_46	426787	0	0	0	0	0	8.15333	0	0	0	0
estExt_fgenesh1_pm.C_110469	436664	0	0	0	0	0	7.29508	0	0	0	0
Hetan1.estExt_Genewise1.C_110899	38802	24.7657	37.5212	192.447	28.0207	0	79.8168	0	361.339	0	0
Hetan1.Genemark.6963_g	105890	0	0	0	0	0	6.00771	0	22.5837	0	0
fgenesh1_pg.04_#_594	426682	0	56.2818	48.1118	0	0	77.6712	0	0	0	0
estExt_Genemark.C_030148	457831	0	0	0	0	0	6.86596	0	0	0	0
Hetan1.EuGene10000141	162536	0	0	0	0	0	11.1572	0	0	0	0
estExt_Genewise1.C_080206	386765	0	0	0	0	0	11.5863	0	0	0	0
Genemark.3746_g	450918	0	0	0	0	0	8.15333	0	0	0	0
Hetan1.EuGene13000352	164633	0	0	0	0	0	16.3067	0	0	0	0
Hetan1.estExt_fgenesh2_pm.C_30474	154988	24.7657	18.7606	12.0279	0	0	13.3028	0	0	0	0
Hetan1.Genemark.2543_g	101470	24.7657	0	12.0279	0	0	8.58245	0	0	0	0
Hetan1.EuGene10000518	162913	0	0	0	0	0	6.86596	0	0	0	0
e_gw1.09.1571.1	325135	0	0	0	0	0	10.7281	0	0	0	20.9466
e_gw1.12.163.1	330527	0	0	0	0	0	11.5863	0	0	0	0
Hetan1.gw1.14.108.1	12392	0	0	0	0	0	16.3067	0	0	0	0
e_gw1.08.647.1	324812	0	0	0	0	0	13.7319	0	0	0	0
estExt_Genewise1Plus.C_071547	477710	0	0	0	0	0	11.5863	0	0	0	0
Hetan1.e_gw1.4.2096.1	47915	24.7657	0	84.1956	0	0	3808.89	62.1654	90.3348	42.0304	62.8399
fgenesh1_pm.05_#_817	418221	0	0	0	0	0	14.161	0	0	0	0
estExt_fgenesh1_pg.C_120314	446810	24.7657	0	0	0	0	15.0193	0	0	0	0
Hetan1.Genemark.23_g	98950	0	0	0	0	0	10.2989	0	22.5837	0	0
Hetan1.EuGene11000144	163173	0	0	0	0	0	9.86982	0	0	0	0
gw1.02.3513.1	246524	0	0	0	0	0	11.1572	0	0	0	0
estExt_fgenesh1_pg.C_110050	446436	0	0	0	0	0	9.86982	0	0	0	0
e_gw1.01.868.1	305531	0	0	0	0	0	12.8737	0	0	0	0
e_gw1.11.1569.1	328108	0	0	0	0	0	10.7281	0	0	0	0
Hetan1.Genemark.6275_g	105202	0	0	0	0	0	16.3067	0	0	0	0
Hetan1.Genemark.7025_g	105952	0	0	0	0	0	6.00771	0	0	0	0
Hetan1.EuGene12000503	164154	0	0	0	0	0	6.86596	12.4331	0	0	0
gw1.01.3540.1	246583	0	0	0	0	0	6.43684	0	0	0	0
e_gw1.07.1789.1	322098	0	0	0	0	0	13.3028	0	0	0	0
Hetan1.fgenesh2_pm.C_scaffold_1000163	121342	0	0	0	0	0	12.0154	0	0	0	0
estExt_Genewise1.C_020773	379299	24.7657	0	0	0	0	9.44069	0	0	0	0
Hetan1.Genemark.7654_g	106581	0	0	0	0	0	15.8775	0	0	0	0
Hetan1.fgenesh2_pg.C_scaffold_3000250	115762	0	0	0	0	0	17.1649	0	0	0	0
gw1.11.1733.1	245749	0	0	0	0	0	11.1572	0	0	0	0
Hetan1.estExt_fgenesh3_kg.C_150057	149167	0	0	0	0	0	13.3028	0	0	0	0
e_gw1.02.3541.1	309670	0	0	0	0	0	9.86982	0	0	0	0
estExt_Genemark.C_060542	459487	0	0	0	0	0	10.7281	0	0	0	0
Hetan1.Genemark.8097_g	107024	0	0	0	0	0	6.43684	0	0	0	0
Hetan1.fgenesh2_pg.C_scaffold_10000235	119286	0	0	24.0559	0	0	7.29508	0	0	0	0
Genemark.5869_g	453041	0	0	0	0	0	9.86982	0	0	0	0
Hetan1.Genemark.3464_g	102391	0	0	0	0	0	15.4484	0	0	0	0
estExt_fgenesh1_kg.C_130076	442473	0	0	0	0	0	11.1572	0	0	0	0
gw1.12.1494.1	244204	0	0	0	0	0	9.86982	0	0	0	0
Hetan1.estExt_fgenesh3_kg.C_100178	148361	0	0	0	0	0	7.29508	0	0	0	0
Hetan1.Genemark.789_g	99716	0	0	0	0	0	15.0193	0	0	0	0
estExt_fgenesh1_pg.C_080170	445737	0	0	0	0	0	9.86982	0	0	0	0
Hetan1.e_gw1.3.1310.1	45250	0	0	0	0	0	12.4446	0	0	0	0
estExt_Genewise1Plus.C_120603	481455	0	0	0	0	0	9.44069	0	0	0	0
estExt_fgenesh1_pm.C_030530	433086	0	0	0	0	0	9.01157	0	0	0	0
gw1.11.1785.1	247165	0	18.7606	0	0	0	8.58245	0	0	0	0
e_gw1.08.2186.1	323441	0	0	12.0279	0	0	6.86596	0	0	0	0
e_gw1.11.685.1	328172	0	0	0	0	0	8.58245	0	0	0	0
Hetan1.EuGene1000780	166699	0	0	0	0	0	8.15333	0	0	0	0
Genemark.366_g	447538	0	0	0	0	0	12.8737	12.4331	0	0	0
Hetan1.estExt_Genewise1.C_90448	37715	0	0	0	28.0207	0	7.7242	0	0	0	0
estExt_fgenesh1_kg.C_100082	441715	0	0	0	0	0	10.2989	0	0	0	0
Hetan1.EuGene4000162	170147	0	0	0	0	0	5.57859	0	0	0	0
Hetan1.estExt_Genewise1Plus.C_31274	61849	0	0	0	0	0	13.3028	0	0	0	0
Genemark.8771_g	455943	0	0	0	0	0	8.58245	0	0	0	0
fgenesh1_pm.06_#_573	418828	0	0	0	0	0	11.1572	0	0	0	0
estExt_Genewise1.C_091395	388434	0	0	0	0	0	9.86982	0	0	0	0
fgenesh1_pm.12_#_40	422355	0	0	0	0	0	7.7242	0	0	0	0
gw1.09.1653.1	241720	0	0	0	0	0	12.0154	0	0	0	0
fgenesh1_pg.09_#_375	429320	0	18.7606	60.1397	0	0	0.858245	0	0	0	0
Genemark.8943_g	456115	0	0	0	0	0	9.01157	0	0	0	0
Hetan1.fgenesh2_pm.C_scaffold_9000058	125676	0	0	0	0	0	6.86596	0	0	0	0
Hetan1.Genemark.867_g	99794	0	0	0	0	0	5.14947	0	0	0	0
Hetan1.estExt_fgenesh2_pg.C_140245	153262	0	0	0	0	0	7.29508	0	0	0	0
e_gw1.04.2312.1	315978	0	0	0	0	0	8.15333	0	0	0	0
Hetan1.fgenesh2_pm.C_scaffold_8000210	125540	24.7657	0	12.0279	0	31.9975	4.72035	0	22.5837	0	0
e_gw1.06.364.1	320137	0	0	0	0	0	8.15333	0	0	0	0
Hetan1.EuGene11000521	163550	0	0	0	0	0	10.7281	0	0	0	0
estExt_Genewise1Plus.C_062076	476959	0	0	0	0	0	9.86982	0	0	0	0
Hetan1.Genemark.7827_g	106754	0	0	0	0	0	4.72035	0	0	0	0
fgenesh1_pg.02_#_228	424703	0	0	0	0	0	5.57859	0	0	0	0
Hetan1.YAI_EuGene16000107	181063	123.828	56.2818	12.0279	0	31.9975	0.429122	24.8662	0	0	0
gw1.08.1497.1	237117	0	0	0	0	0	7.7242	0	0	0	0
fgenesh1_kg.01_#_141_#_1529_1_CCOZ_CCPA_CCPB_CCPC_EXTA	406665	0	0	0	0	0	11.1572	0	0	0	0
Hetan1.Genemark.7794_g	106721	0	0	0	0	0	4.72035	0	0	0	0
Hetan1.Genemark.3062_g	101989	0	0	0	0	0	9.86982	0	0	0	0
estExt_fgenesh1_pg.C_020769	443851	0	0	0	0	0	9.86982	0	0	0	0
Hetan1.fgenesh2_pm.C_scaffold_10000114	125998	0	0	0	0	0	9.86982	0	0	0	0
e_gw1.01.2713.1	305962	0	0	0	0	0	6.86596	0	0	0	0
e_gw1.13.1420.1	330950	0	0	0	0	0	6.86596	0	0	0	0
estExt_fgenesh1_kg.C_040485	439810	0	0	0	0	0	8.15333	0	0	0	0
estExt_fgenesh1_kg.C_010060	437479	0	0	0	0	0	11.5863	0	0	0	0
Hetan1.Genemark.6765_g	105692	0	0	0	0	0	8.15333	0	0	0	0
fgenesh1_pg.07_#_222	428192	0	0	0	0	0	7.29508	0	0	0	0
Hetan1.gw1.10.856.1	27192	0	0	0	0	0	10.2989	0	0	0	0
Hetan1.e_gw1.11.544.1	54556	0	0	0	0	0	4.72035	0	0	0	0
fgenesh1_pm.05_#_404	417808	0	0	0	0	0	10.7281	0	0	0	0
Hetan1.Genemark.6536_g	105463	0	0	0	0	0	9.01157	0	0	0	0
Hetan1.estExt_fgenesh2_pg.C_90353	152352	0	0	0	0	0	6.86596	0	0	0	0
fgenesh1_pg.05_#_626	427367	0	0	0	0	0	6.86596	0	0	0	0
Genemark.164_g	447336	0	0	0	0	0	10.2989	0	0	0	0
Hetan1.Genemark.7055_g	105982	0	0	0	0	0	7.7242	0	0	0	0
e_gw1.08.1717.1	324478	0	0	0	0	0	7.29508	0	0	0	0
Hetan1.Genemark.7078_g	106005	0	0	0	0	0	8.58245	0	0	0	0
Hetan1.Genemark.2365_g	101292	0	0	0	0	0	7.7242	0	0	0	0
Hetan1.Genemark.7586_g	106513	0	0	0	0	0	6.43684	0	0	0	0
Hetan1.estExt_fgenesh2_pg.C_120266	152933	0	0	12.0279	0	0	5.57859	0	0	0	41.8933
estExt_fgenesh1_pg.C_010122	442874	0	0	0	0	0	8.15333	0	0	0	0
Genemark.7475_g	454647	0	0	0	0	0	4.29122	0	0	0	0
e_gw1.06.1395.1	319641	0	0	0	0	0	6.00771	0	0	0	0
Hetan1.fgenesh3_kg.9__74__0_0_CCPB2012.b1_CCOZ_CCPA_CCPB_CCPC_EXTA	143673	0	0	0	0	0	6.86596	0	0	0	0
estExt_fgenesh1_pm.C_050410	434205	0	0	0	28.0207	0	5.57859	0	0	0	0
Hetan1.Genemark.9449_g	108376	24.7657	0	36.0838	0	0	63.5101	0	0	0	0
Hetan1.EuGene11000045	163074	0	0	0	0	0	6.00771	0	0	0	0
Hetan1.estExt_Genewise1Plus.C_21896	61120	0	0	0	0	0	4.29122	0	0	0	0
Genemark.2512_g	449684	0	0	0	0	0	6.43684	0	0	0	0
fgenesh1_pg.09_#_268	429213	0	0	0	0	0	7.7242	12.4331	0	0	20.9466
estExt_Genewise1.C_020866	379342	0	0	0	0	0	9.01157	0	0	0	0
Genemark.7774_g	454946	0	0	0	0	0	6.00771	0	0	0	0
Hetan1.e_gw1.10.142.1	54234	0	0	0	0	0	4.29122	0	0	0	0
e_gw1.11.1529.1	328638	0	0	0	0	0	4.29122	0	0	0	0
fgenesh1_pg.02_#_79	424554	0	0	0	0	0	9.01157	0	0	0	0
fgenesh1_pg.08_#_190	428632	0	0	0	0	0	7.7242	0	0	0	0
e_gw1.03.1409.1	313698	0	0	0	0	0	6.00771	0	0	0	0
estExt_Genewise1Plus.C_011290	468790	0	0	0	0	0	6.86596	0	0	0	0
Hetan1.Genemark.9228_g	108155	0	0	0	0	0	7.7242	0	0	0	0
e_gw1.03.400.1	313059	0	0	0	0	0	9.01157	0	0	0	0
Hetan1.fgenesh2_pm.C_scaffold_2000613	122670	0	0	0	0	0	6.43684	0	0	0	0
fgenesh1_pm.09_#_602	421111	0	37.5212	36.0838	28.0207	0	0.858245	24.8662	0	0	20.9466
Hetan1.fgenesh2_pg.C_scaffold_14000114	120540	0	0	0	0	0	8.58245	0	0	0	0
estExt_fgenesh1_pg.C_120122	446707	0	0	0	0	0	7.7242	0	0	0	0
Hetan1.EuGene12000016	163667	0	0	0	0	0	5.57859	0	0	0	0
estExt_Genewise1Plus.C_140669	482734	0	0	0	0	0	3.8621	0	0	0	0
Hetan1.estExt_fgenesh2_pg.C_30163	150414	0	0	0	0	0	6.43684	0	0	0	0
Hetan1.fgenesh2_pg.C_scaffold_12000318	120104	0	0	24.0559	0	31.9975	2.14561	0	45.1674	0	0
Hetan1.EuGene10000067	162462	0	0	0	0	0	6.86596	0	0	0	0
fgenesh1_kg.05_#_123_#_5377_0_CCPC843.g1_CCOZ_CCPA_CCPB_CCPC_EXTA	409392	0	0	0	0	0	6.86596	0	0	0	0
Hetan1.e_gw1.5.156.1	49239	0	0	0	0	0	6.43684	0	0	0	0
e_gw1.07.926.1	322960	0	0	0	0	0	3.8621	0	0	0	0
Hetan1.fgenesh2_pg.C_scaffold_2000544	115317	0	0	0	0	0	5.14947	0	0	0	0
estExt_fgenesh1_pm.C_100465	436352	0	0	0	0	0	7.29508	0	0	0	0
e_gw1.11.1802.1	328569	0	0	0	0	0	5.14947	0	0	0	0
estExt_Genewise1Plus.C_130999	482267	0	0	0	0	0	6.00771	0	0	0	0
estExt_Genewise1.C_032736	382367	0	0	0	0	0	4.72035	0	0	0	0
Hetan1.Genemark.8216_g	107143	0	0	0	0	0	6.43684	0	0	0	0
gw1.13.1278.1	243345	0	0	0	0	0	3.8621	0	0	0	0
Hetan1.EuGene15000210	165394	0	0	0	0	0	5.57859	0	0	0	0
e_gw1.07.2061.1	322342	0	0	0	0	0	6.86596	0	0	0	0
e_gw1.10.365.1	326455	0	0	0	0	0	6.86596	0	0	0	0
e_gw1.09.1026.1	325418	0	0	0	0	0	6.86596	0	0	0	0
Hetan1.dfl_YAI_gw1.8.895.1	181229	24.7657	0	12.0279	0	0	5.14947	0	0	0	0
Hetan1.Genemark.3244_g	102171	0	0	0	0	0	3.43298	0	0	0	0
Genemark.4630_g	451802	0	0	0	0	0	5.57859	0	0	0	0
Hetan1.Genemark.2406_g	101333	0	0	0	0	0	4.72035	0	0	0	0
Hetan1.gw1.3.1614.1	26301	0	0	0	0	0	4.29122	0	0	0	0
estExt_fgenesh1_kg.C_060269	440488	0	0	0	0	0	4.72035	0	0	0	0
fgenesh1_pg.01_#_825	424471	0	0	0	0	0	3.43298	0	0	0	0
fgenesh1_pg.01_#_585	424231	0	0	0	0	0	5.57859	0	0	0	0
fgenesh1_pm.14_#_329	423596	0	0	0	0	0	4.29122	0	0	0	0
e_gw1.09.916.1	325115	0	0	0	0	0	6.00771	0	0	0	0
e_gw1.09.263.1	326002	0	0	12.0279	28.0207	31.9975	0.858245	12.4331	0	0	20.9466
e_gw1.02.3503.1	309928	0	0	0	0	0	4.29122	0	0	0	0
Genemark.9153_g	456325	0	0	0	0	0	4.29122	0	0	0	0
Hetan1.estExt_fgenesh3_kg.C_50180	147202	24.7657	0	0	0	0	3.8621	0	0	0	0
e_gw1.10.538.1	326903	0	0	0	0	0	3.43298	0	0	0	0
e_gw1.03.1459.1	311728	0	0	0	0	0	5.57859	0	0	0	0
fgenesh1_pg.03_#_715	425969	0	0	0	0	0	4.29122	0	0	0	0
gw1.12.786.1	222332	0	0	0	0	0	4.29122	0	0	0	0
gw1.08.1725.1	240447	0	0	0	0	0	5.14947	0	0	0	0
Genemark.3645_g	450817	0	0	0	0	0	3.43298	0	0	0	0
estExt_Genewise1Plus.C_013208	470016	0	0	0	0	0	2.14561	0	45.1674	0	0
fgenesh1_pg.11_#_52	429843	0	0	36.0838	56.0415	0	0	0	0	0	0
gw1.03.3579.1	247562	0	0	0	0	0	3.00386	0	0	0	0
Genemark.9054_g	456226	0	0	0	0	0	3.00386	0	0	0	0
e_gw1.02.989.1	310228	0	0	0	0	0	4.29122	0	0	0	0
e_gw1.05.223.1	318964	0	0	0	0	0	4.29122	0	0	0	0
e_gw1.07.854.1	322741	0	0	0	0	0	4.72035	0	0	0	0
estExt_fgenesh1_pm.C_090567	436050	49.5313	0	0	28.0207	0	2.14561	0	0	0	0
Genemark.5850_g	453022	0	0	0	0	0	3.8621	0	0	0	0
Genemark.1145_g	448317	0	0	0	0	0	2.57473	0	0	0	0
Hetan1.Genemark.5402_g	104329	24.7657	0	0	0	0	2.57473	0	0	0	0
estExt_Genewise1Plus.C_091290	479489	0	0	24.0559	0	0	1.28737	12.4331	0	0	0
fgenesh1_pm.01_#_543	413401	0	0	0	0	0	2.57473	0	0	0	0
Hetan1.Genemark.9913_g	108840	0	0	0	0	0	3.00386	0	0	0	0
gw1.07.2068.1	247120	0	0	0	0	0	3.43298	0	0	0	0
Hetan1.EuGene13000463	164744	0	0	0	0	0	3.00386	0	0	0	0
fgenesh1_pg.03_#_209	425463	0	0	0	0	0	3.00386	0	0	0	0
Hetan1.Genemark.5577_g	104504	0	0	0	0	0	3.00386	0	0	0	0
fgenesh1_pm.07_#_75	419214	0	0	0	0	0	3.43298	0	0	0	0
e_gw1.09.88.1	325629	0	0	0	28.0207	0	0.858245	24.8662	0	0	20.9466
estExt_fgenesh1_kg.C_010178	437584	0	0	0	0	0	3.43298	0	0	0	0
Genemark.751_g	447923	0	0	0	0	0	3.00386	0	0	0	0
fgenesh1_pg.11_#_229	430020	0	0	0	0	0	2.57473	0	0	0	0
Hetan1.EuGene9000567	174915	0	0	0	0	0	2.57473	0	0	0	0
Genemark.8474_g	455646	0	0	0	0	0	2.57473	0	0	0	0
Genemark.6925_g	454097	0	0	0	0	0	2.57473	0	0	0	0
e_gw1.07.453.1	322676	0	0	0	0	0	2.57473	0	0	0	0
Hetan1.fgenesh2_pg.C_scaffold_16000041	120928	0	0	0	0	0	1.28737	0	22.5837	0	41.8933
fgenesh1_pg.08_#_280	428722	0	18.7606	0	0	0	2.14561	0	0	0	0
gw1.02.3152.1	243308	0	0	0	0	0	2.57473	0	0	0	0
Genemark.1102_g	448274	0	0	0	0	0	2.57473	0	0	0	0
fgenesh1_pm.01_#_607	413465	0	0	0	0	0	2.14561	0	0	0	0
estExt_Genewise1Plus.C_071439	477676	0	0	0	0	0	2.14561	0	0	0	0
e_gw1.09.1129.1	326023	0	37.5212	0	0	0	0.429122	12.4331	22.5837	0	0
fgenesh1_pm.09_#_531	421040	0	37.5212	0	0	31.9975	0	0	22.5837	0	0
e_gw1.06.1255.1	319809	0	0	36.0838	0	0	0.858245	0	0	0	0
Genemark.7058_g	454230	24.7657	37.5212	0	0	0	0.429122	0	0	0	0
e_gw1.09.1478.1	326030	0	18.7606	12.0279	0	0	0.429122	0	0	0	0
