# Supplementary material for: Dual RNA-seq analysis provides new insights into interactions between Norway spruce and necrotrophic pathogen Heterobasidion annosum s.l
Source: BMC Plant Biol. 2019 Jan 3;19:2. doi: 10.1186/s12870-018-1602-0 (PMC6318961; doi:10.1186/s12870-018-1602-0)
Supplement: Supplementary file 3 — Table S3. List of Norway spruce genes showing higher transcript abundance in asymptomatic trees. (XLSX 25 kb) [file 12870_2018_1602_MOESM3_ESM.xlsx]

## Sheet: Sheet2
Table S3. List of Norway spruce genes showing higher transcript abundance in asymptomatic trees
ConGenie gene model	logFC	logCPM	PValue	FDR	Annotation
MA_9239704g0010	7.91634	2.86818	4.25786e-27	1.04473e-22	uncharacterized conserved protein
MA_10430554g0010	4.24618	1.80735	1.0794e-15	3.49808e-12	TIFY domain containing protein: might be functionally linked to jasmonic acid response
MA_139193g0010	3.29967	4.28802	5.25674e-14	1.17941e-10	beta glucosidase
MA_907913g0010	8.08241	-0.0302167	5.338e-13	8.64964e-10	uncharacterized hypothetical protein
MA_10427294g0010	3.20881	2.26421	3.63765e-12	4.5285e-09	Protein of unknown function (DUF761)
MA_59489g0010	2.43477	5.88195	1.62893e-11	1.63831e-08	nitrate transporter
MA_38978g0020	5.07114	1.05762	2.43764e-11	2.24768e-08	heat shock protein
MA_3813981g0010	5.47461	0.0799544	4.52773e-11	3.88412e-08	LRR receptor-like kinase
MA_88153g0010	2.29144	4.77616	7.53428e-11	6.10423e-08	glutamate receptor
MA_516918g0010	5.47247	2.52056	1.12711e-10	8.22412e-08	dsRNA-binding protein
MA_10426205g0010	4.19581	6.18056	1.24793e-10	8.87768e-08	beta glucosidase
MA_51223g0010	2.28159	4.77108	1.46076e-10	1.01443e-07	uncharacterized hypothetical protein
MA_10432302g0010	2.56882	3.68719	1.63896e-10	1.11171e-07	NAD(P)-linked oxidoreductase superfamily protein
MA_854569g0010	3.5205	1.66111	2.91339e-10	1.77031e-07	Nodulin MtN3 family protein
MA_769805g0010	4.23059	1.04584	3.73788e-10	2.1377e-07	hemoglobin
MA_12848g0010	3.11831	2.50511	9.44196e-10	5.1961e-07	Member of a family of proteins related to PUP1, a purine transporter. May be involved in the transport of purine and purine derivatives such as cytokinins, across the plasma membrane.
MA_269680g0010	2.33715	4.4618	1.68556e-09	8.62506e-07	Ca2+regulated serine-threonine protein kinase family protein
MA_80387g0010	3.5552	5.34651	3.39368e-09	1.61552e-06	member of High affinity nitrate transporter family
MA_42003g0010	3.12776	4.44167	5.19175e-09	2.26011e-06	Protein kinase superfamily protein
MA_75731g0010	2.98369	5.27591	5.47936e-09	2.35024e-06	LOB domain-containing protein
MA_10042710g0010	3.27125	2.04547	6.41727e-09	2.71264e-06	uncharacterized hypothetical protein
MA_18275g0010	4.12554	3.59366	1.0411e-08	4.04878e-06	LRR receptor-like kinase
MA_781664g0010	3.73679	4.60765	1.18571e-08	4.49138e-06	beta glucosidase
MA_27987g0010	2.69486	3.01042	1.25501e-08	4.69295e-06	Abscisic acid receptor
MA_387320g0010	2.24567	6.09234	1.27271e-08	4.69888e-06	MFS transporter
MA_194736g0010	3.35726	3.065	1.39119e-08	4.97069e-06	PEBP (phosphatidylethanolamine-binding protein) family protein
MA_10430749g0010	2.56913	3.95874	1.39746e-08	4.97069e-06	Protein of unknown function (DUF761)
MA_837745g0010	3.1486	4.32941	1.71359e-08	5.95005e-06	cytochrome P450, family 867
MA_425689g0010	3.55988	4.86124	2.52647e-08	8.00972e-06	NAD(P)-linked oxidoreductase superfamily protein
MA_10427269g0010	2.33168	4.84439	2.51101e-08	8.00972e-06	uncharacterized hypothetical protein
MA_7303847g0010	2.39805	3.35803	2.58814e-08	8.07233e-06	uncharacterized hypothetical protein
MA_10428846g0020	3.09976	1.12652	5.91689e-08	1.59169e-05	IAA carboxylmethyltransferase 1
MA_7616952g0010	2.4313	2.74332	6.95967e-08	1.7964e-05	uncharacterized hypothetical protein
MA_10245438g0010	2.4678	2.32494	7.94381e-08	1.94703e-05	NBS-LRR receptor protein
MA_459631g0010	3.1446	3.1694	7.92947e-08	1.94703e-05	Nodulin MtN3 family protein
MA_647690g0010	4.74043	0.487582	8.43682e-08	2.05064e-05	LRR receptor-like kinase
MA_547006g0010	3.9689	0.0397029	9.20324e-08	2.21844e-05	LRR receptor-like kinase
MA_10429519g0010	5.50217	3.97911	1.2459e-07	2.93058e-05	NBS-LRR receptor protein
MA_44596g0010	4.08465	0.518746	1.38038e-07	3.19535e-05	cysteine-rich receptor-like protein kinase
MA_9407888g0010	3.34864	4.1213	1.80137e-07	3.82367e-05	NAD(P)-linked oxidoreductase superfamily protein
MA_947311g0010	3.32663	0.765738	2.33269e-07	4.72484e-05	responsive to dehydration 22 (RD22) mediated by ABA
MA_19942g0010	2.40758	6.68356	2.56046e-07	5.08033e-05	Receptor kinase-like protein family
MA_8605604g0010	3.17258	3.54748	3.10177e-07	5.99135e-05	uncharacterized hypothetical protein
MA_176417g0010	2.41954	3.00792	3.8683e-07	7.14094e-05	leucoanthocyanidin reductase 3 (LAR3)
MA_10427724g0020	2.93774	1.08623	3.97e-07	7.28257e-05	uncharacterized hypothetical protein
MA_315425g0010	3.64074	-0.0474135	4.23308e-07	7.6687e-05	Cinnamate:CoA ligase, putative
MA_658418g0010	2.46764	4.2351	4.92066e-07	8.69823e-05	receptor-like kinase, wall-associated
MA_10435813g0010	2.79218	3.77914	5.34241e-07	9.29311e-05	sodium transporter (HKT1) expressed in xylem parenchyma cells. Mutants over-accumulate sodium in shoot tissue and have increased sodium in the xylem sap and reduced sodium in phloem sap and roots.
MA_224722g0020	2.68689	0.882154	6.15875e-07	0.000103834	ABA/WDS induced protein
MA_70143g0010	2.82511	2.10862	7.95662e-07	0.000130377	uncharacterized hypothetical protein
MA_170275g0010	2.39652	3.11944	1.17172e-06	0.000177997	MATE efflux family protein
MA_80965g0010	3.08229	4.26402	1.33319e-06	0.000200439	FMO1 is required for full expression of TIR-NB-LRR-conditioned resistance to avirulent pathogens and for basal resistance to invasive virulent pathogens. Functions in an EDS1-regulated but SA-independent mechanism that promotes resistance and cell death at pathogen infection sites.
MA_136975g0010	3.30346	2.43192	1.34588e-06	0.000201309	polyubiquitin; induced by salicylic acid in Arabidopsis
MA_281794g0010	2.49802	1.3501	1.40785e-06	0.000207388	UDP-glucosyl transferase
MA_67269g0010	3.87866	2.85249	1.78958e-06	0.000252158	uncharacterized hypothetical protein
MA_78163g0020	2.72669	4.58195	1.84509e-06	0.00025873	IAA carboxylmethyltransferase
MA_273678g0010	3.29279	0.706398	2.21933e-06	0.000303902	receptor-like kinase
MA_10427811g0010	3.1679	2.66107	2.27563e-06	0.000308713	2-oxoglutarate (2OG) and Fe(II)-dependent oxygenase superfamily protein
MA_10428445g0020	3.36854	1.66578	2.26812e-06	0.000308713	uncharacterized hypothetical protein
MA_180532g0010	2.78014	1.04422	2.32153e-06	0.000313481	cytochrome P450, family 76; putative flavonoid 3',5'-hydroxylase
MA_10426551g0010	8.99418	7.04936	2.85389e-06	0.00037485	terpene synthase; most similar (but not identical) to humulene and longifolene synthases
MA_7232141g0010	2.31266	1.30755	3.32806e-06	0.000419833	LRR domain-containing protein; partial
MA_17102g0020	4.80411	5.80264	3.45204e-06	0.000428449	phenylcoumaran benzylic ether reductase
MA_147441g0010	2.78989	1.33798	3.52442e-06	0.000434384	Phosphatidylethanolamine-binding protein PEBP
MA_6502794g0010	2.54853	2.56887	3.71884e-06	0.000450939	LRR receptor-like kinase
MA_504966g0010	2.77985	0.719228	3.7815e-06	0.000453889	glutathione S-transferase tau
MA_10427828g0010	2.64518	1.14821	3.85937e-06	0.000461338	ABA/WDS induced protein
MA_494569g0010	2.32501	1.94227	4.01586e-06	0.0004723	uncharacterized hypothetical protein
MA_10017564g0010	5.72332	2.25832	4.06612e-06	0.000474444	Phosphate-responsive 1 family protein
MA_799401g0010	2.4736	1.28001	4.58989e-06	0.000503283	cytochrome P450 family 736
MA_10429280g0020	2.66889	6.9085	4.63383e-06	0.000503465	UDP-Glycosyltransferase superfamily protein
MA_8379917g0010	2.73679	0.693534	4.9945e-06	0.000532541	2-oxoglutarate (2OG) and Fe(II)-dependent oxygenase superfamily protein
MA_31778g0010	2.46648	5.34062	5.59018e-06	0.000582317	cytokinin oxidase, putative
MA_323184g0010	2.61063	3.94415	5.96553e-06	0.000609329	MFS transporter
MA_923474g0010	2.78176	3.42784	7.53634e-06	0.000735159	Heavy metal transport/detoxification superfamily protein
MA_20495g0010	3.44598	0.403717	8.27365e-06	0.000793807	Seven transmembrane MLO family protein; might have a rol ein cell death and defence responses
MA_101154g0010	3.04909	1.04485	8.61593e-06	0.000815268	RING-H2 protein induced after exposure to chitin or inactivated crude cellulase preparations.
MA_30375g0010	2.73235	1.83164	9.47166e-06	0.000868742	Induced by low temperatures, dehydration and salt stress and ABA. Encodes a small (54 amino acids), highly hydrophobic protein that bears two potential transmembrane domains.
MA_2674g0010	2.38853	2.95236	1.021e-05	0.000924827	MATE efflux family protein
MA_218328g0010	2.13904	2.29406	1.13011e-05	0.00100801	PDR7 ABC transporter
MA_10353658g0010	2.75297	1.64944	1.19026e-05	0.00105843	terpene synthase; most similar (but not identical) to delta-selinene synthase
MA_375637g0010	2.15792	3.59029	1.25778e-05	0.00110833	chloride channel
MA_7031g0010	4.31893	6.17755	1.2782e-05	0.00111956	MATE efflux family protein
MA_85663g0010	2.52536	4.60355	1.29618e-05	0.00113191	LRR receptor-like kinase
MA_656523g0010	2.54977	2.70838	1.3174e-05	0.00113683	Glycosyl hydrolase family protein
MA_10433081g0020	2.46985	0.908284	1.55349e-05	0.00130955	lipase that hydrolyzes phosphatidylcholine, glycolipids as well as triacylglycerols.
MA_79254g0010	2.2252	3.10792	1.6081e-05	0.0013478	malate transporter
MA_10432802g0010	2.89211	3.12692	1.62847e-05	0.00136096	Chlorophyll A-B binding family protein
MA_5846220g0010	3.03407	1.22452	1.63682e-05	0.00136403	receptor-like kinase, wall-associated
MA_10435349g0020	2.36848	2.98725	1.87233e-05	0.00154266	uncharacterized hypothetical protein
MA_656884g0010	2.01408	4.4623	2.05695e-05	0.00166191	Regulator of Vps4 activity in the MVB pathway protein
MA_10390553g0020	2.81136	-0.0973177	2.09743e-05	0.00167896	LAP2, an aminopeptidase playing key roles in senescence, stress response and amino acid turnover.
MA_531014g0010	2.12873	2.50171	2.34411e-05	0.00183792	transmembrane receptor
MA_10211971g0010	2.92975	2.73114	2.79054e-05	0.00211407	PR-5 thaumatin-like protein
MA_10428670g0010	2.00894	2.27578	2.8684e-05	0.0021452	HXXXD-type acyl-transferase family protein
MA_10428004g0010	3.07278	3.29469	2.85156e-05	0.0021452	NAD(P)-linked oxidoreductase superfamily protein
MA_10194606g0010	2.29775	1.53382	2.85616e-05	0.0021452	uncharacterized hypothetical protein
MA_445633g0010	2.55478	0.754502	2.94044e-05	0.0021779	methionine synthase
MA_7843014g0010	2.52496	1.78002	2.92957e-05	0.0021779	uncharacterized hypothetical protein
MA_106517g0010	2.21571	1.2482	3.14126e-05	0.00227914	transmembrane receptor
MA_19739g0010	2.87808	0.938061	3.68209e-05	0.00260037	uncharacterized hypothetical protein
MA_20495g0020	3.32113	2.27993	3.96855e-05	0.00273642	Seven transmembrane MLO family protein; might have a rol ein cell death and defence responses
MA_127644g0010	2.08553	2.54779	4.1711e-05	0.0028227	uncharacterized hypothetical protein
MA_843141g0010	2.31183	2.23435	4.33337e-05	0.00289889	LRR receptor-like kinase
MA_125113g0010	2.15118	2.89064	4.80834e-05	0.00313047	glutathione peroxidase
MA_10428408g0010	2.69878	3.10235	5.62148e-05	0.00358778	metallothionein-like protein
MA_13550g0010	2.27952	1.8368	6.5431e-05	0.00399749	cytochrome P450, family 76
MA_10436072g0030	2.27737	3.01278	7.04661e-05	0.00424181	acyl activating enzyme 5
MA_922309g0010	2.07621	1.33518	7.10224e-05	0.00426237	ERF/AP2 transcription factor family member
MA_7386776g0010	4.21362	2.88128	7.45301e-05	0.00443637	2-oxoglutarate (2OG) and Fe(II)-dependent oxygenase superfamily protein
MA_10428883g0010	2.89237	1.9459	7.5947e-05	0.0044932	uncharacterized hypothetical protein
MA_54077g0010	4.77981	4.11637	7.69971e-05	0.00452841	LRR receptor-like kinase
MA_867871g0010	2.77828	0.970977	8.2407e-05	0.00478798	MYB transcriptional regulator
MA_169181g0010	2.35296	1.8897	8.38671e-05	0.00484535	LRR receptor-like kinase
MA_300643g0010	2.29591	3.54947	8.63818e-05	0.00495308	LRR receptor-like kinase
MA_19195g0010	2.02427	2.23637	9.43608e-05	0.00532487	HXXXD-type acyl-transferase family protein
MA_203031g0010	2.39129	-0.251686	9.59699e-05	0.00535211	Cyclin family protein
MA_139442g0010	2.09309	1.19707	0.000101329	0.00558689	transmembrane protein involved in cuticle and wax biosynthesis
MA_10426907g0010	2.85027	3.62958	0.00010465	0.0057053	aspartyl protease family protein
MA_180495g0010	2.42358	1.36815	0.000107569	0.00581011	Glycosyl hydrolase family protein
MA_7106627g0010	3.28824	0.305141	0.000113877	0.00603751	uncharacterized hypothetical protein
MA_120879g0010	2.11256	1.86534	0.000120896	0.00633063	uncharacterized hypothetical protein
MA_170302g0010	2.13748	6.03111	0.00012388	0.00640639	alpha/beta-Hydrolases superfamily protein
MA_72344g0010	2.06428	0.797708	0.000127637	0.00654267	Nodulin MtN3 family protein
MA_6256298g0010	2.76813	2.55132	0.000133554	0.00678184	dehydrin
MA_9498544g0010	2.00921	4.05298	0.000134276	0.00679937	hydroxy methylglutaryl CoA reductase
MA_27083g0010	2.45733	-0.109172	0.000135084	0.00680651	Concanavalin A-like lectin protein kinase family protein
MA_747559g0010	2.59729	1.54549	0.000144553	0.0072195	dehydrin
MA_10428341g0010	2.09546	4.29697	0.000151553	0.00750483	MFS transporter
MA_9565901g0010	2.96283	0.618302	0.000170163	0.00813629	NBS-LRR receptor protein
MA_386438g0010	2.59868	1.13387	0.000197083	0.00912431	caffeic acid O-methyl transferase; partial
MA_828526g0010	2.08813	2.94261	0.000206055	0.00937597	germin-like protein
MA_50074g0010	2.1713	4.97835	0.000226193	0.0100228	L-galactose-1-phosphate phosphatase, involved in ascorbate biosynthesis
MA_19627g0010	2.30271	2.67435	0.000231185	0.010108	hydroxy methylglutaryl CoA reductase
MA_10434542g0010	3.08067	2.04954	0.000235271	0.0102284	terpene synthase; most similar (but not identical) to humulene and longifolene synthases
MA_10432405g0010	2.06545	7.38203	0.00023769	0.0103012	alpha/beta-Hydrolases superfamily protein
MA_10181288g0010	2.03046	6.44937	0.000244648	0.0105112	leucoanthocyanidin reductase 1 (LAR1)
MA_10429511g0010	2.38046	3.68238	0.000266087	0.0111669	Thaumatin
MA_45568g0010	2.46657	1.42993	0.000279564	0.0116155	Protein of unknown function (DUF688)
MA_87837g0010	2.0861	2.1984	0.000300704	0.0120637	L-galactose-1-phosphate phosphatase, involved in ascorbate biosynthesis
MA_7119239g0010	2.74581	2.62955	0.000299595	0.0120637	LRR domain-containing protein; partial
MA_8914126g0010	2.09223	1.47674	0.000302837	0.0120832	glucose-6-phosphate/phosphate translocator
MA_195617g0010	2.62318	5.74569	0.000318941	0.012554	Auxin responsive protein
MA_19355g0010	2.76267	2.15776	0.000339718	0.0131855	UDP-glucosyl transferase
MA_60904g0010	3.76421	1.95793	0.000338691	0.0131855	uncharacterized hypothetical protein
MA_360807g0010	2.00294	1.59906	0.000348882	0.0134069	alkenal reductase
MA_165733g0010	2.64219	2.93962	0.000382628	0.0144083	Nodulin MtN3 family protein
MA_10435641g0010	2.0849	0.269153	0.000396069	0.0147349	Tetratricopeptide repeat (TPR)-like superfamily protein
MA_8870890g0010	2.25319	1.56121	0.00040411	0.014901	Phosphatidylethanolamine-binding protein PEBP
MA_10427905g0010	3.32182	1.80336	0.000405223	0.0149044	cinnamoyl-CoA reductase, putative
MA_10428235g0020	2.29145	2.2295	0.00043094	0.0155578	NBS-LRR receptor protein
MA_84315g0010	2.52707	4.56411	0.000449502	0.0161461	GRAM domain family protein
MA_5598306g0010	2.0551	1.1795	0.00046633	0.0164895	uncharacterized hypothetical protein
MA_334549g0010	2.06078	2.65077	0.00048302	0.0170148	MATE efflux family protein
MA_77536g0010	2.62016	2.55632	0.00048859	0.0171182	Heavy metal transport/detoxification superfamily protein
MA_9275113g0010	2.55477	2.94629	0.000596999	0.019923	phenylcoumaran benzylic ether reductase
MA_5199180g0010	3.33296	1.7526	0.000631586	0.0207917	LRR receptor-like kinase
MA_9579g0010	2.69842	2.48541	0.000638082	0.0209112	long-chain fatty acid CoA-synthase, putative
MA_39405g0010	2.01128	-0.0371275	0.000657078	0.0213419	Thioesterase superfamily protein
MA_9885357g0010	2.90331	3.65882	0.000698254	0.0223332	phenylcoumaran benzylic ether reductase
MA_1302g0010	2.66364	-0.300724	0.000856054	0.0255957	NBS-LRR receptor protein
MA_9788308g0010	2.1192	2.16133	0.000901239	0.0265252	hydroxy methylglutaryl CoA reductase
MA_10359884g0010	2.03094	0.652501	0.000902438	0.0265337	terpene synthase, partial; most similar to alpha terpineol /1,8-cineole synthase
MA_10435495g0010	2.17601	2.54146	0.000930729	0.0271466	RING/U-box superfamily protein
MA_2040g0010	2.44385	1.59163	0.00096664	0.0278322	ERF/AP2 transcription factor family member
MA_7197623g0010	2.02763	3.69496	0.00100122	0.028546	caffeic acid/5-hydroxyferulic acid O-methyltransferase
MA_676327g0010	2.41154	1.59935	0.00101685	0.0289634	uncharacterized hypothetical protein
MA_10428883g0030	2.59944	2.00681	0.00104811	0.0295937	uncharacterized hypothetical protein
MA_863208g0010	2.72401	2.74359	0.00106215	0.0298455	LRR receptor-like kinase
MA_9401581g0010	2.15712	6.34497	0.00107757	0.0301222	(E,E)-alpha-farnesene synthase/(E)-beta-ocimene synthase, putative, partial
MA_344471g0010	2.49423	0.317785	0.00109672	0.0303205	uncharacterized hypothetical protein
MA_9440597g0010	2.57295	0.95285	0.00115414	0.0313443	similar to Arabidopsis mildew resistance protein
MA_815561g0010	2.94735	5.13857	0.00124153	0.0328301	NBS-LRR receptor protein
MA_9082370g0010	2.07534	1.96913	0.00124635	0.0328714	caffeic acid/5-hydroxyferulic acid O-methyltransferase
MA_9495413g0010	2.16037	1.16652	0.00129009	0.0336613	lipase that hydrolyzes phosphatidylcholine, glycolipids as well as triacylglycerols
MA_10428415g0010	2.63199	2.65495	0.00134224	0.034584	xyloglucan endotransglucosylase/hydrolase 5
MA_33107g0010	2.30169	1.75954	0.00144045	0.0364385	uncharacterized hypothetical protein
MA_10434266g0020	2.73659	0.916954	0.00149452	0.0375191	NBS-LRR receptor protein
MA_10428883g0020	2.62705	3.07308	0.00191601	0.0445379	NBS-LRR receptor protein
MA_25036g0020	2.02363	3.22814	0.00196146	0.0450806	uncharacterized hypothetical protein
MA_134411g0010	2.20585	2.62892	0.00204591	0.0463661	CBL-interacting protein kinase
MA_6170843g0010	2.03313	0.441462	0.00210698	0.0472726	uncharacterized hypothetical protein
MA_59542g0010	2.12614	3.44604	0.00214355	0.0478282	cytochrome P450, family 736
MA_8061716g0010	2.01238	3.9143	0.00225346	0.0494186	(E,E)-alpha-farnesene synthase/(E)-beta-ocimene synthase, putative, partial
